# Supplementary material for: Antiacetylcholinesterase triterpenes from the fruits of Cimicifuga yunnanensis
Source: Royal Society of Chemistry journal article supplement (doi:10.1039/c8ra00291f), 2018-01-01
Supplement: c8ra00291f1.pdf [file c8ra00291f1.pdf]

**Antiacetylcholinesterase Triterpenes from the Fruits of  
*Cimicifuga yunnanensis***

Yin Nian,<sup>a,‡</sup> Ni-Hong Lu,<sup>b,‡</sup> Xiao-Ling Liu,<sup>a,‡</sup> Da-Shan Li,<sup>a</sup> Lin Zhou,<sup>a</sup> Ming-Hua  
Qiu<sup>\*,a</sup>

*<sup>a</sup>State Key Laboratory of Phytochemistry and Plant Resources in West China,  
Institute of Botany, Chinese Academy of Sciences, Kunming 650201, People's  
of China*

*<sup>b</sup>Department of Respiratory Medicine, the Third People's Hospital of Kunming,  
Kunming 650041, People's Republic of China*

## Supporting Information List

Page 3-13,  $^1\text{H}$ ,  $^{13}\text{C}$ , HSQC, HMBC, COSY and ROESY NMR spectra, UV, IR, and CD spectra, and OR and HREIMS experiments of compound **1**.

Page 14-23,  $^1\text{H}$ ,  $^{13}\text{C}$ , HSQC, HMBC, COSY and ROESY NMR spectra, UV and IR spectra, and OR and HREIMS experiments of compound **2**.

Page 24, **Figure S21**. Structure of 17*R*, 20*S*, 23*S*, and 24*R* stereoisomer of **1** and unlikely happened ROESY correlations.

Page 25, **Table S1**. Dose-related inhibitions of compounds **1** and **2** on acetylcholinesterase (AChE).

Page 26, **Figure S22**. Dose-response relationships of compounds **1** (A), **2** (B), and Tacrine (C).

Page 27, **Table S2**. The effects of compounds **1** and **2** on the NGF mediated neurite outgrowth of PC12 cells

Page 28, **Figure S23**. Represented pictures of the NGF mediated neurite outgrowth of PC12 cells.

Page 29-54, Computational methods of **1**.

**Figure S1.**  $^1\text{H}$  (600 Hz) NMR Spectrum of cimyunnin E (**1**) in Pyridine- $d_5$

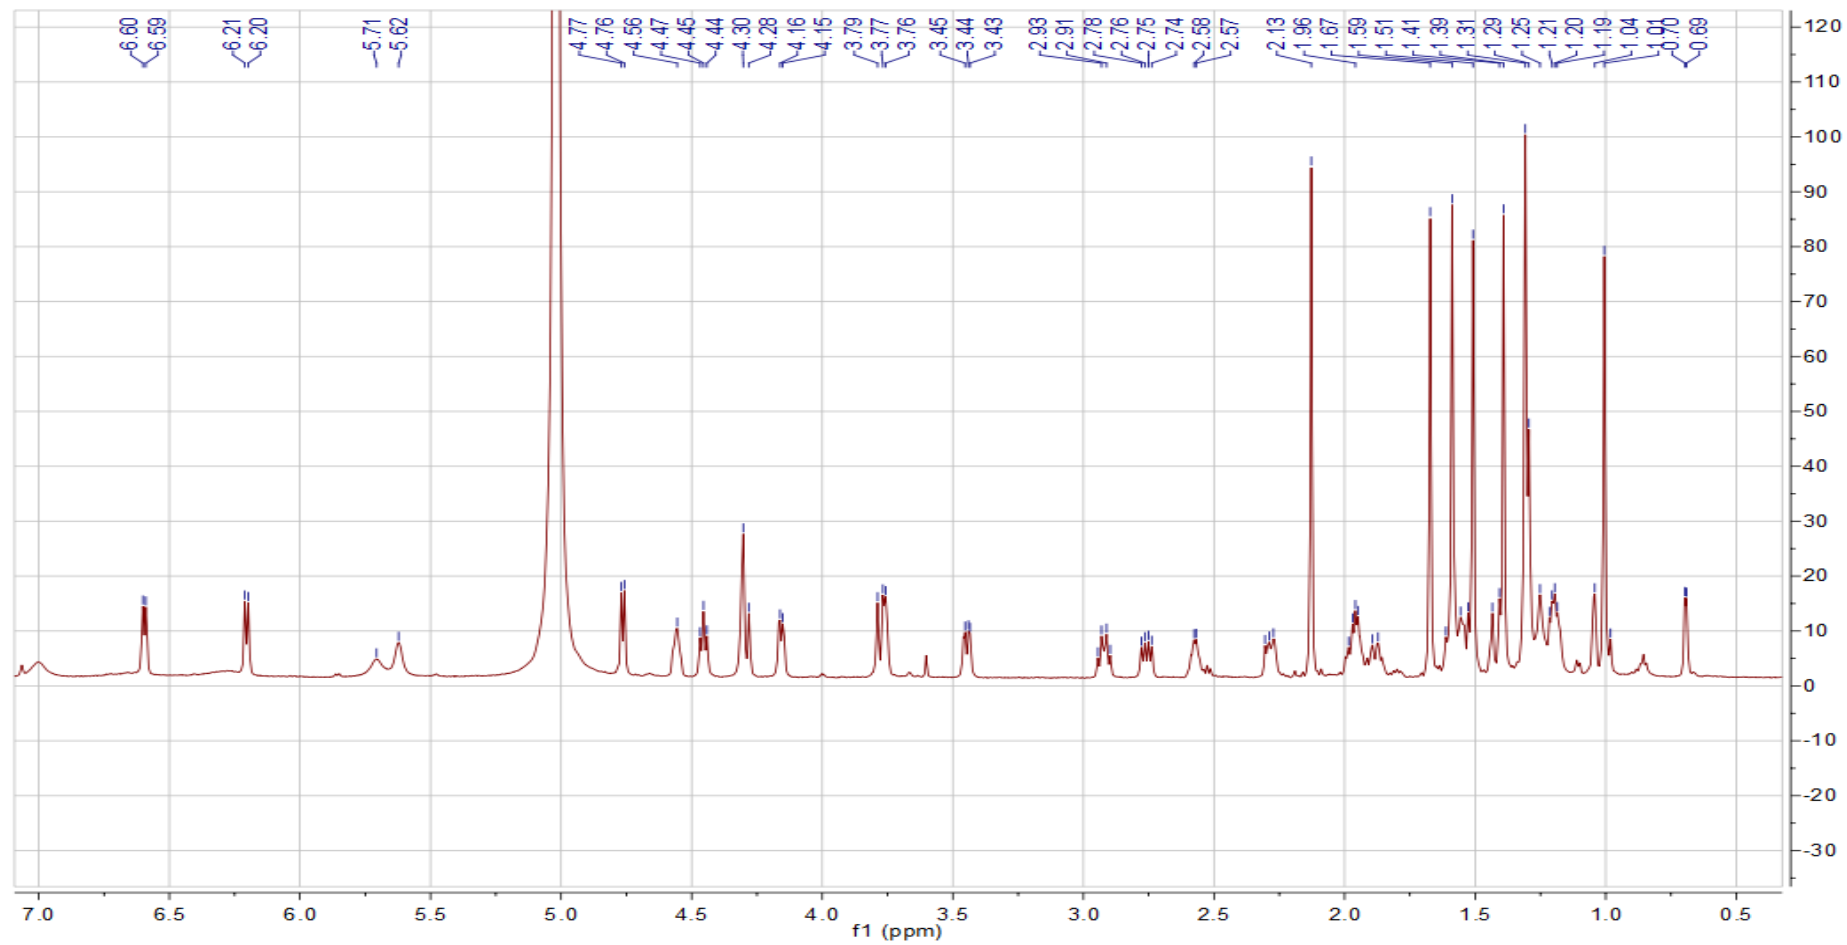

**Figure S2.**  $^{13}\text{C}$  (150 Hz) NMR Spectrum of cimyunin E (**1**) in Pyridine- $d_5$

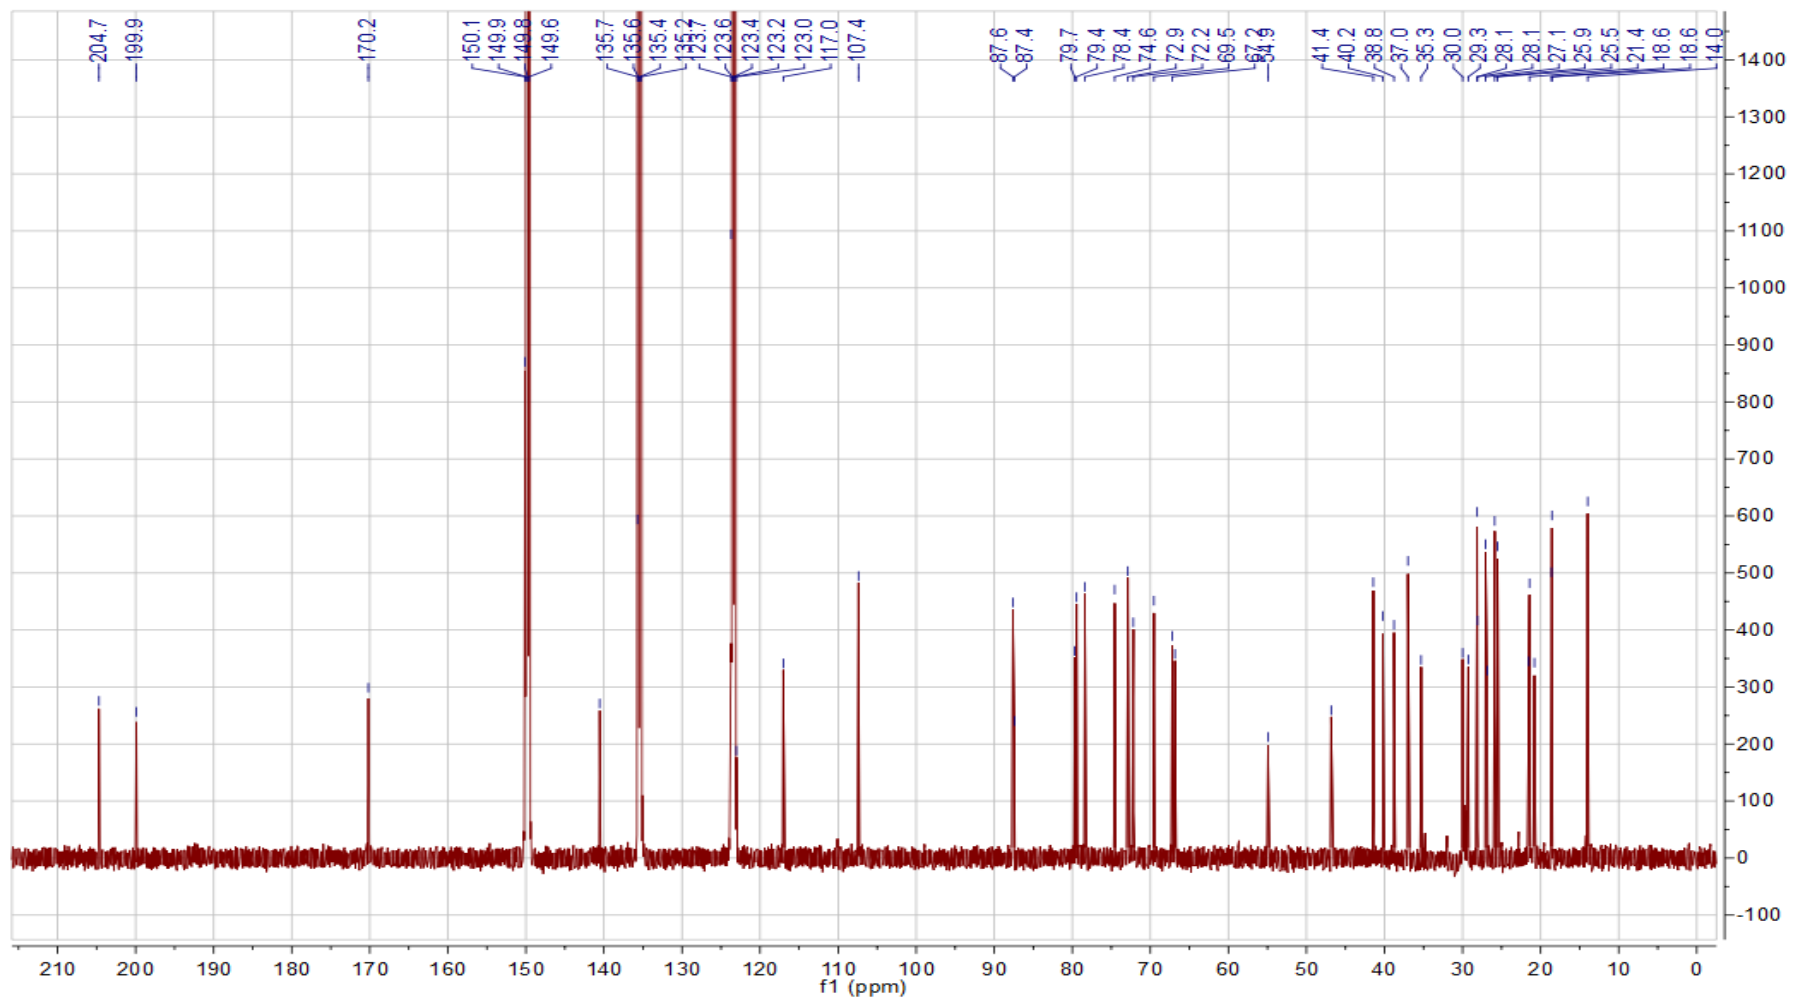

**Figure S3.** HSQC (600 Hz) Spectrum of cimyunnin E (1) in Pyridine- $d_5$

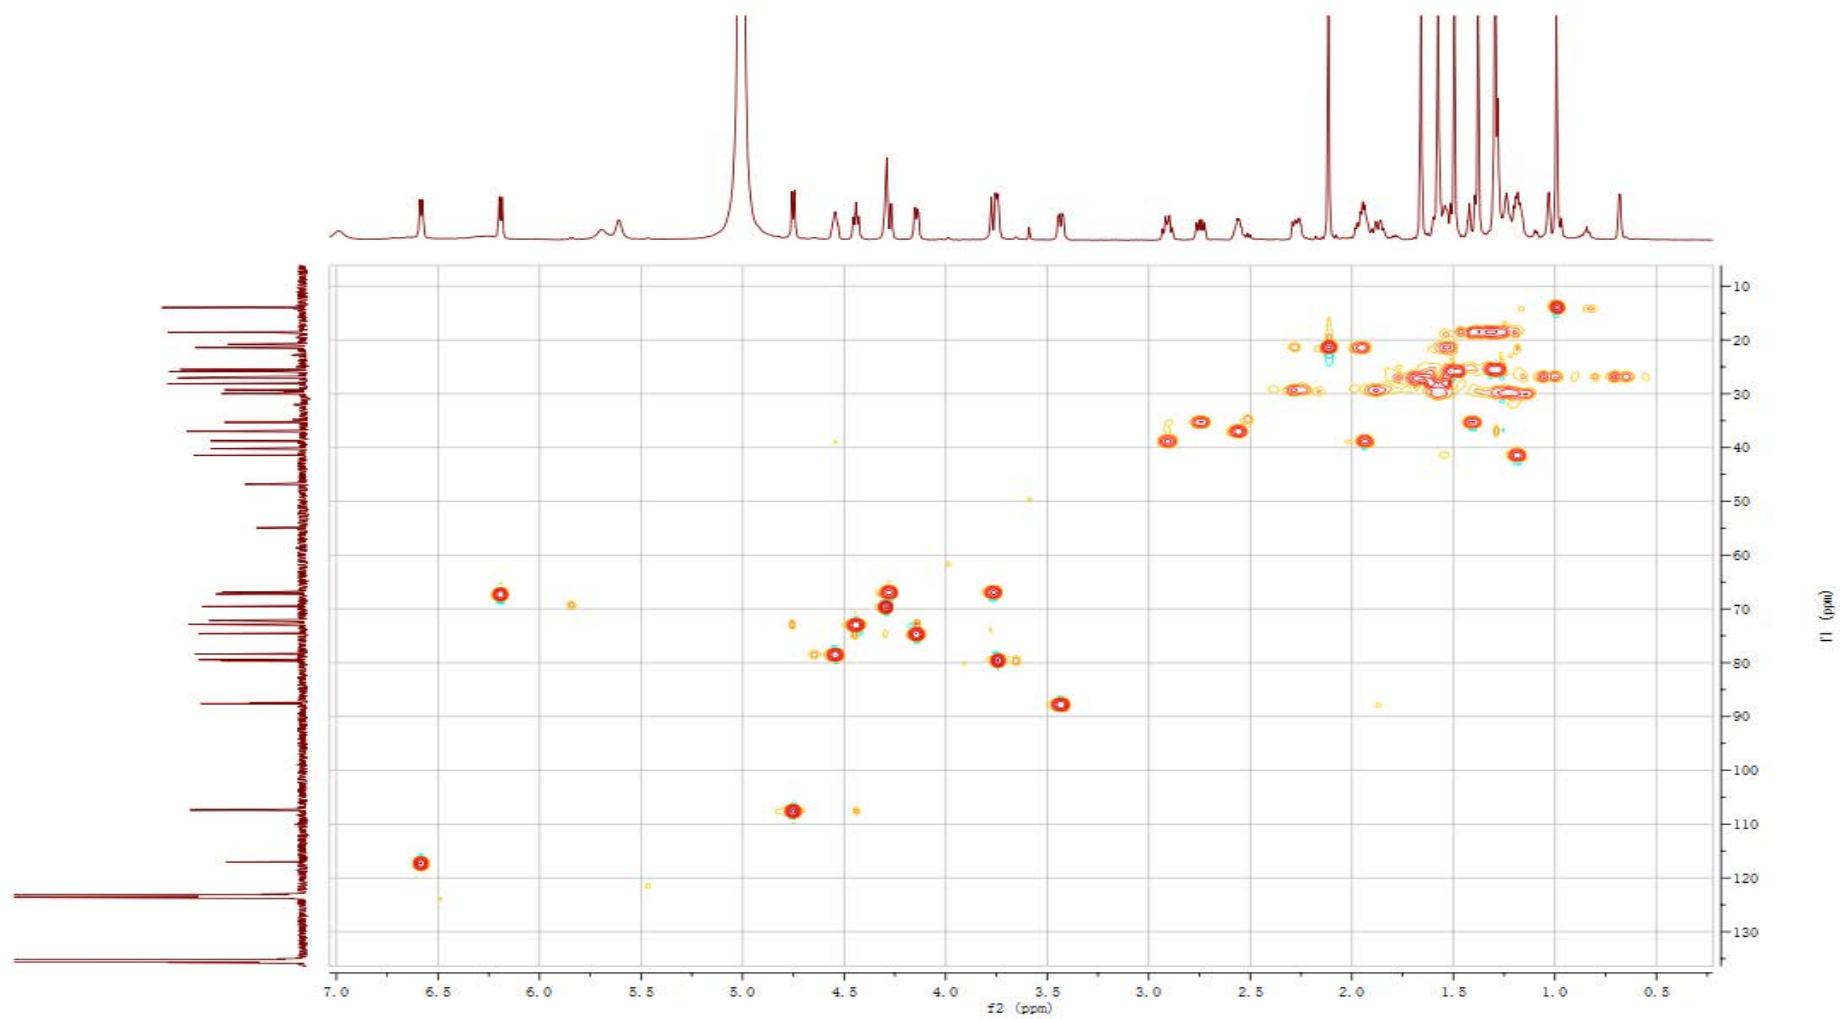

**Figure S4.** HMBC (600 Hz) Spectrum of cimyunnin E (1) in Pyridine- $d_5$

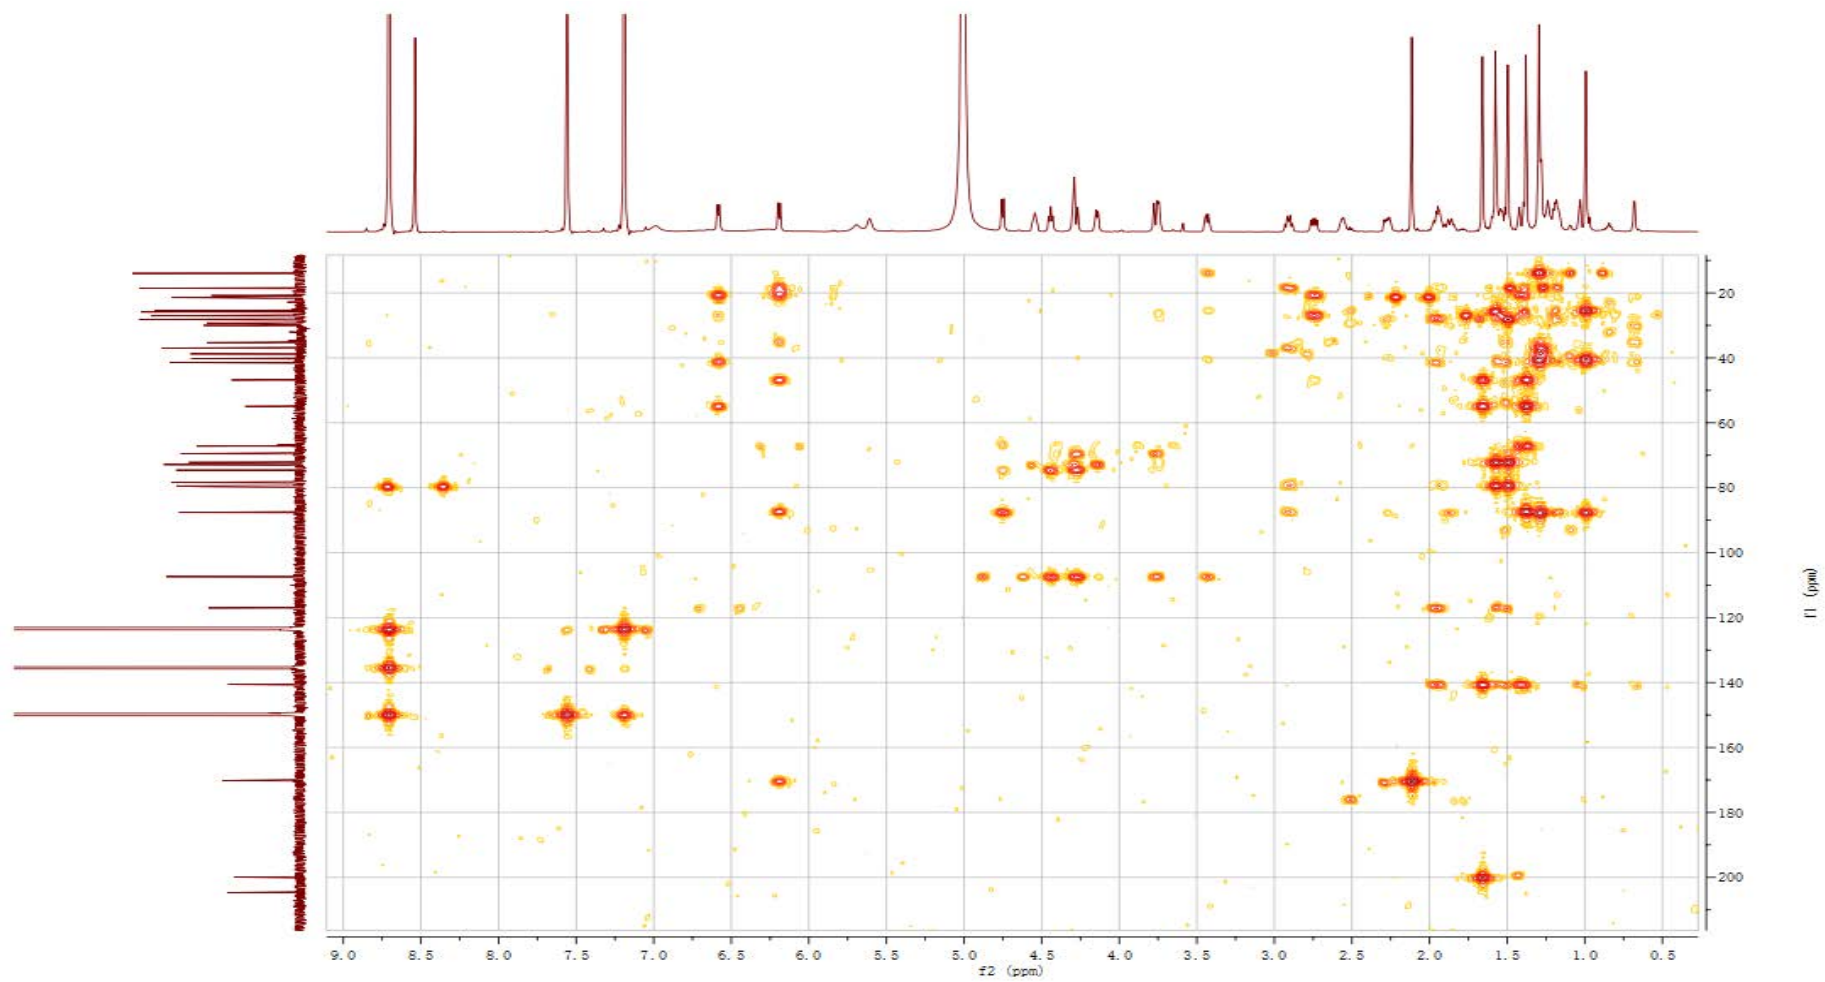

**Figure S5.**  $^1\text{H}$ - $^1\text{H}$  COSY (600 Hz) Spectrum of cimyunnin E (**1**) in Pyridine- $d_5$

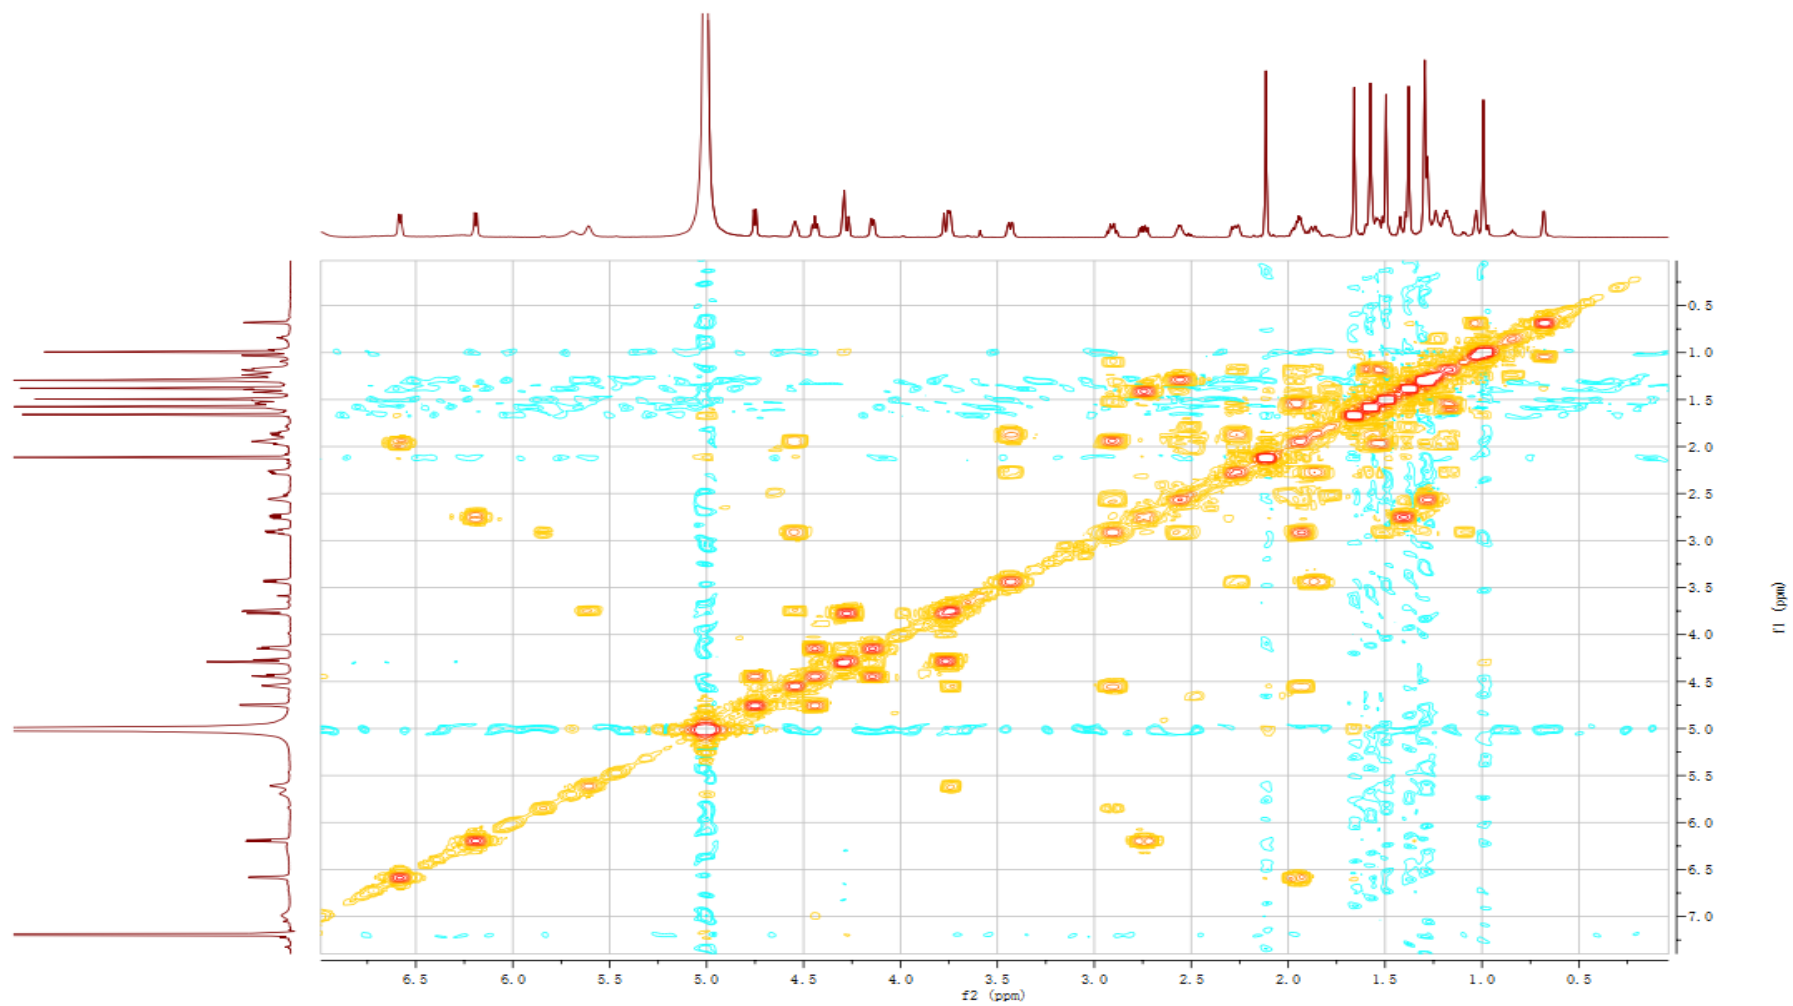

**Figure S6.** ROESY (600 Hz) Spectrum of cimyunnin E (**1**) in Pyridine-*d*<sub>5</sub>

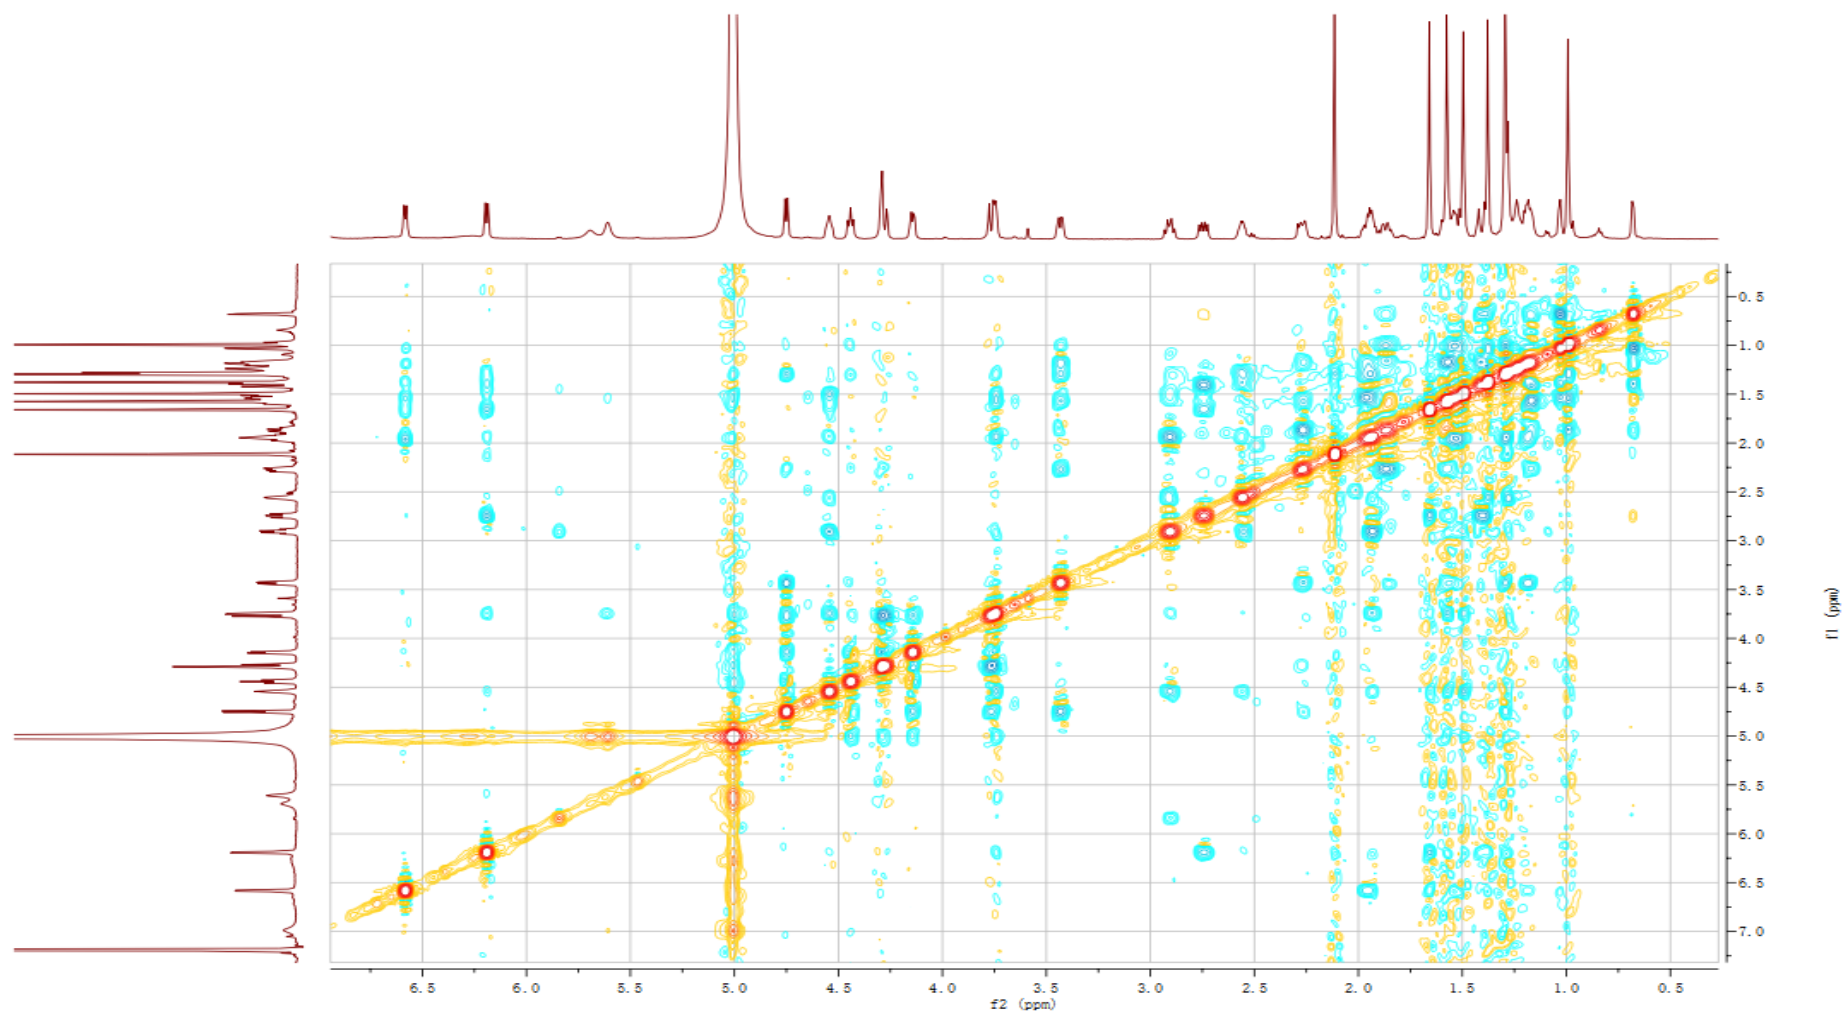



Figure S7. HREIMS of cimyunnin E (1)

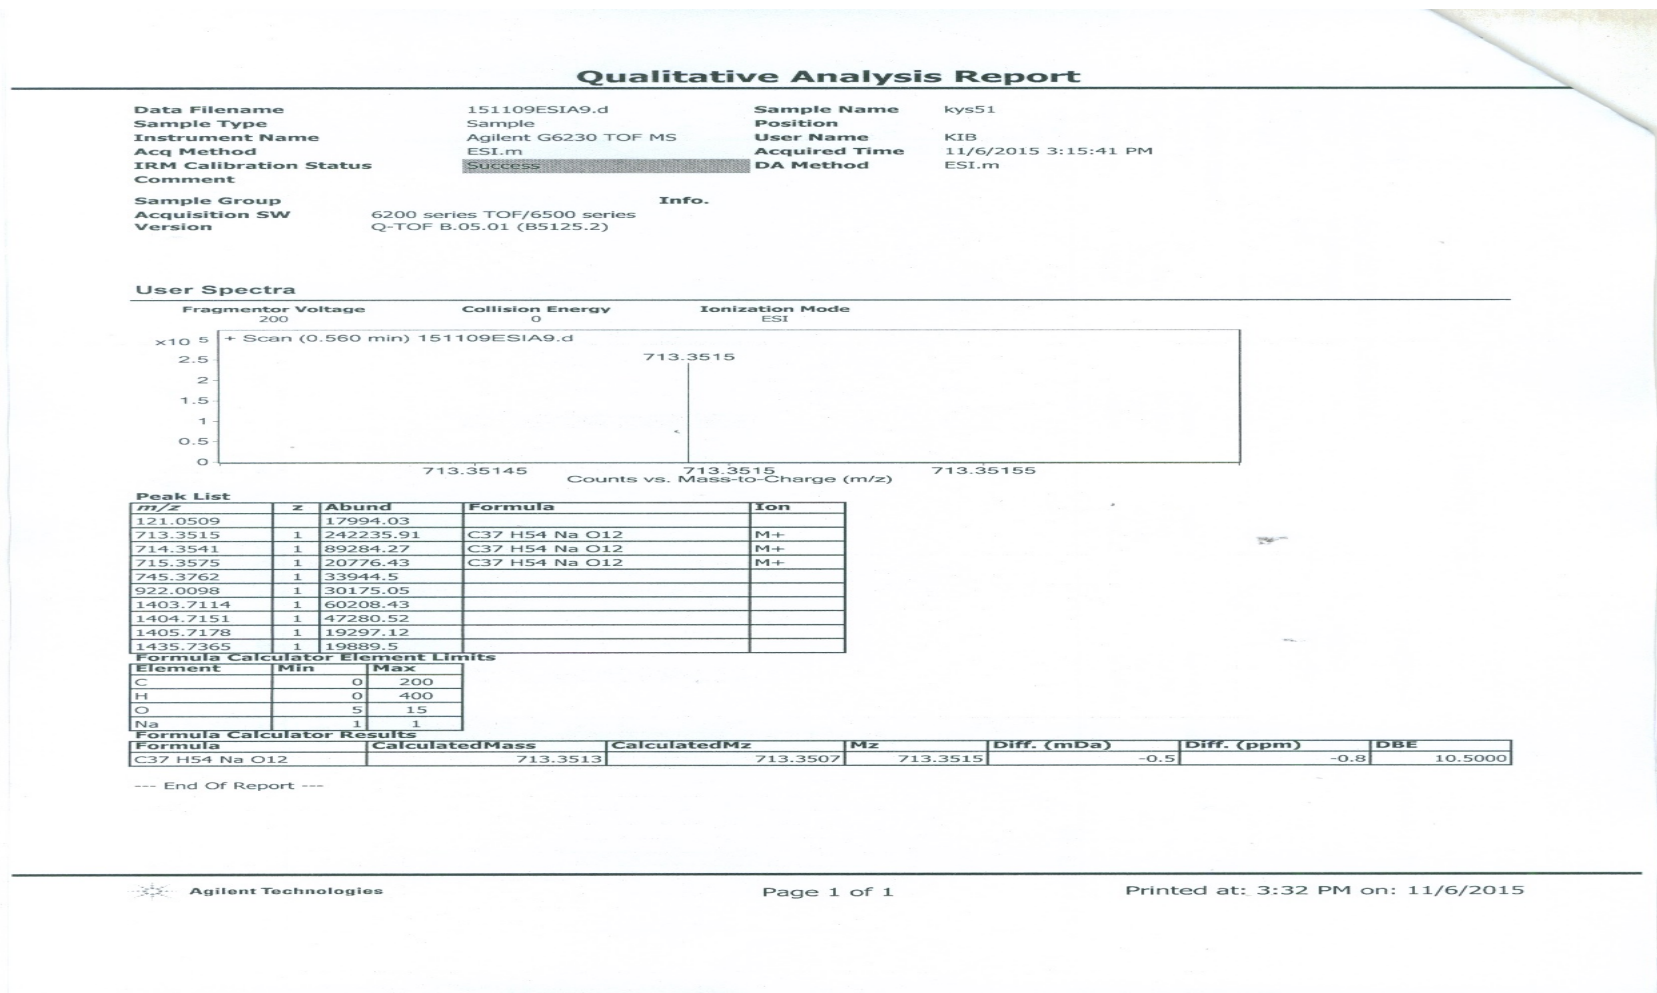

Figure S8. UV spectrum of cimyunnin E (1)

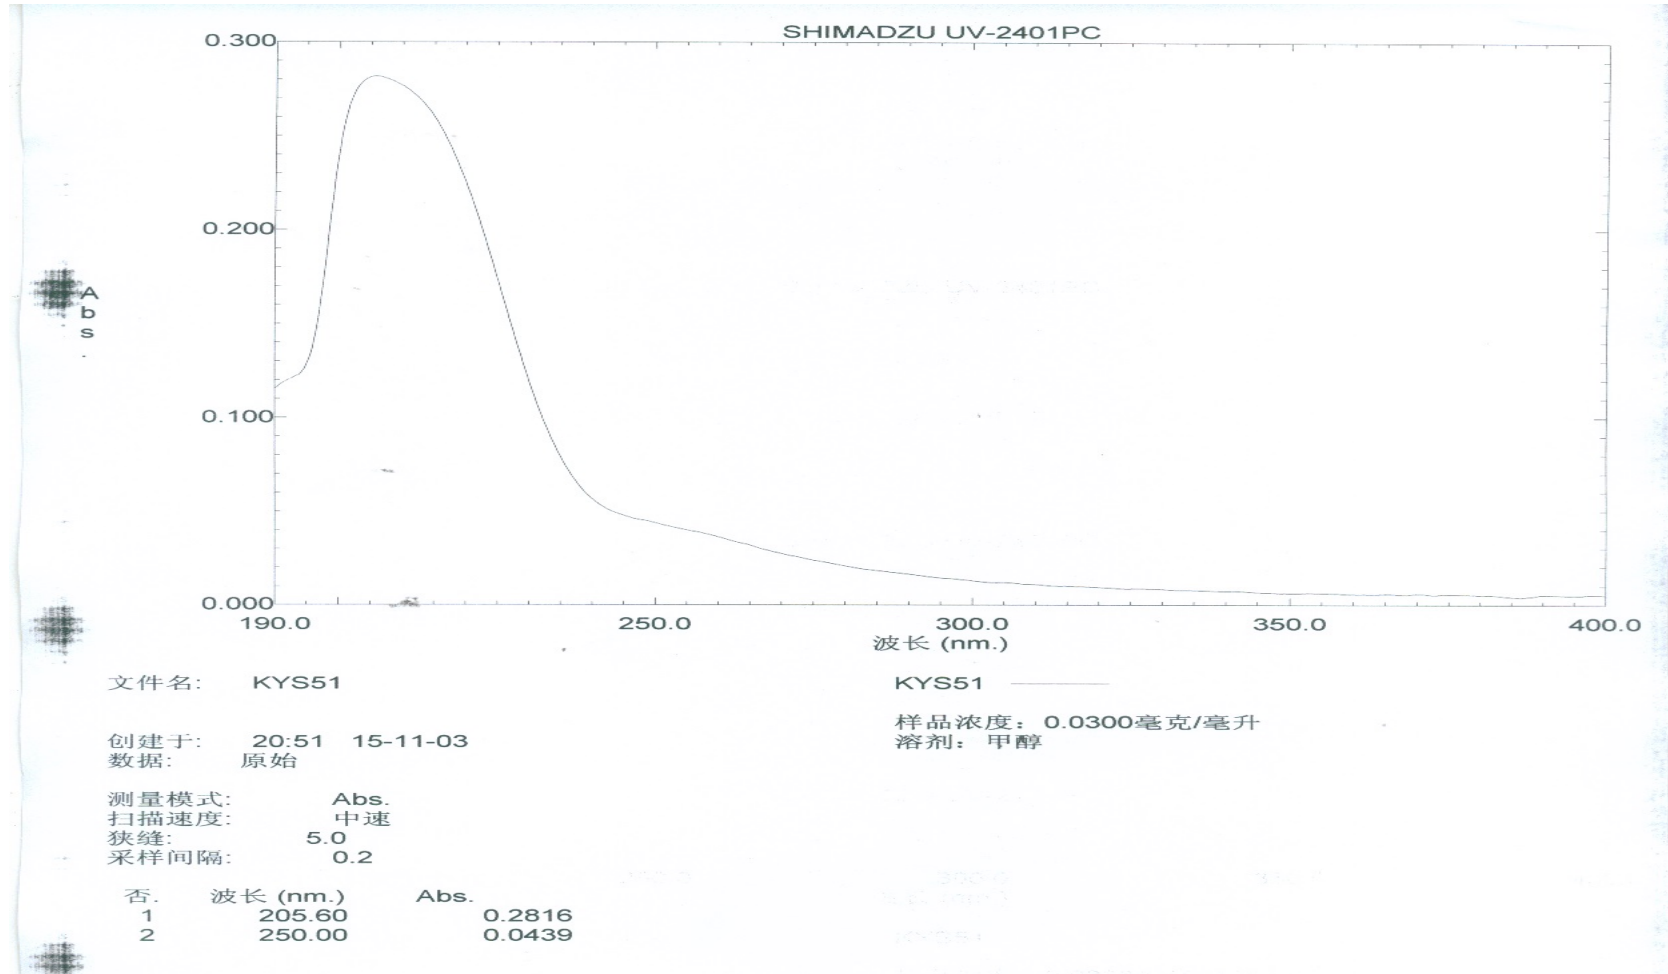

Figure S9. IR spectrum of cimynnin E (1)

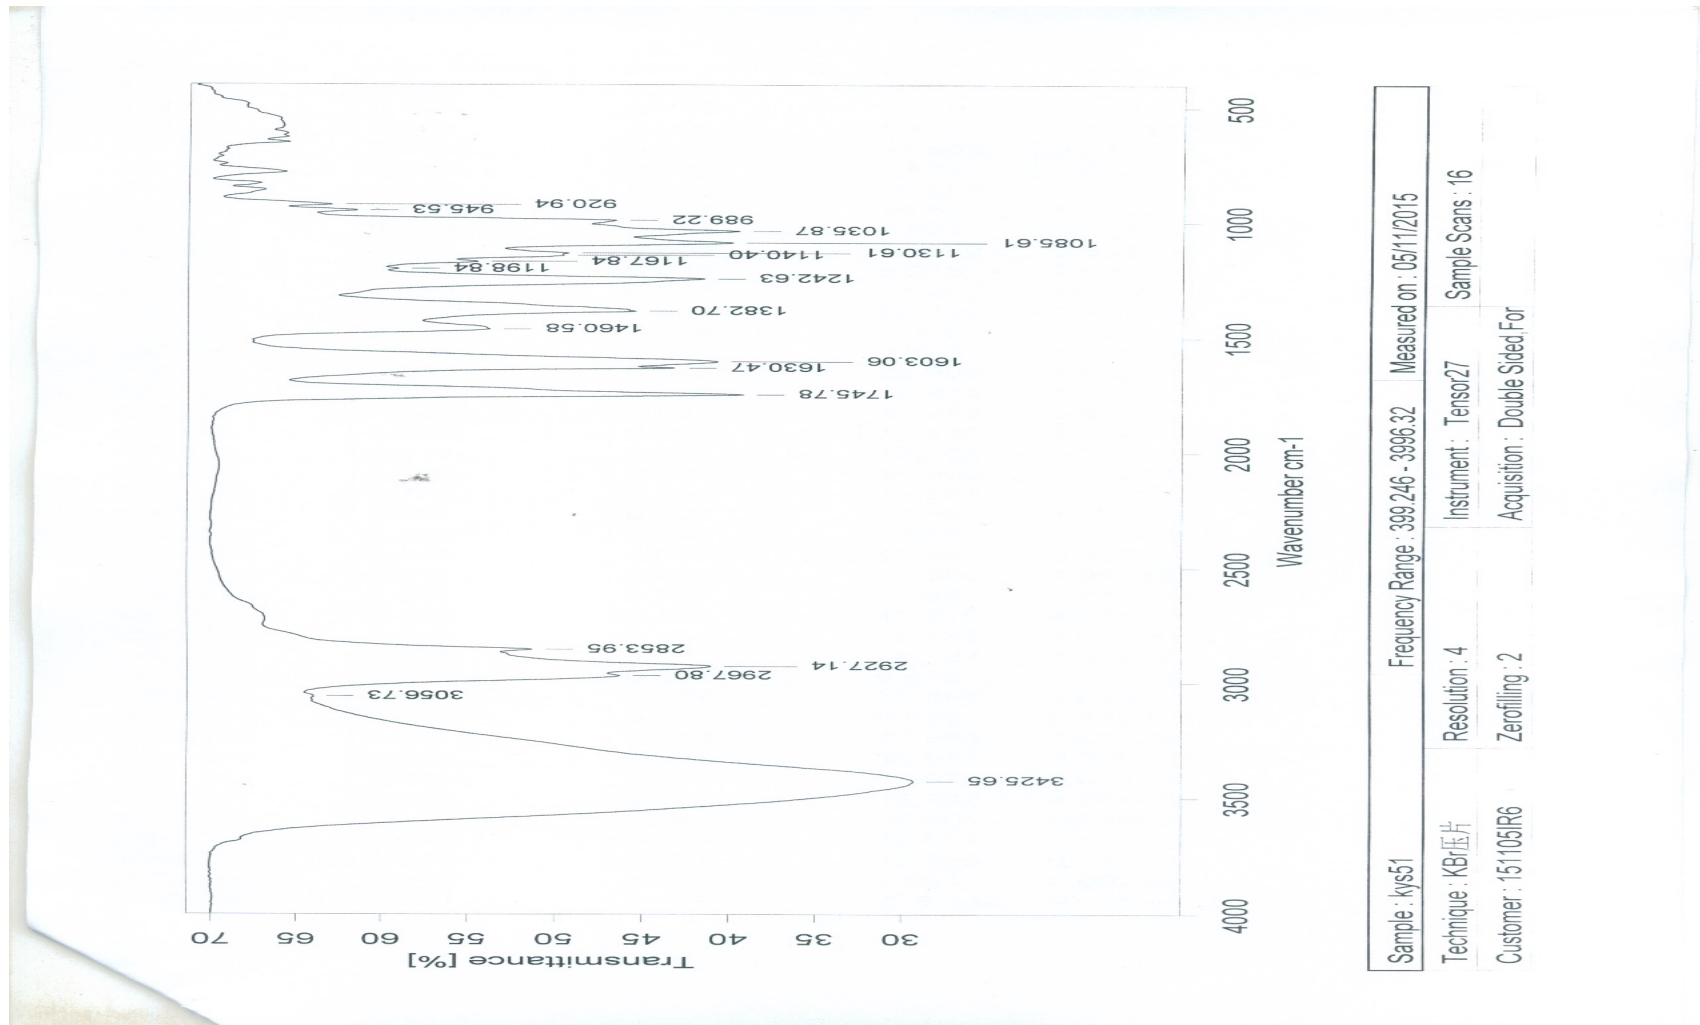

**Figure S10.** CD spectrum of cimyunnin E (1)

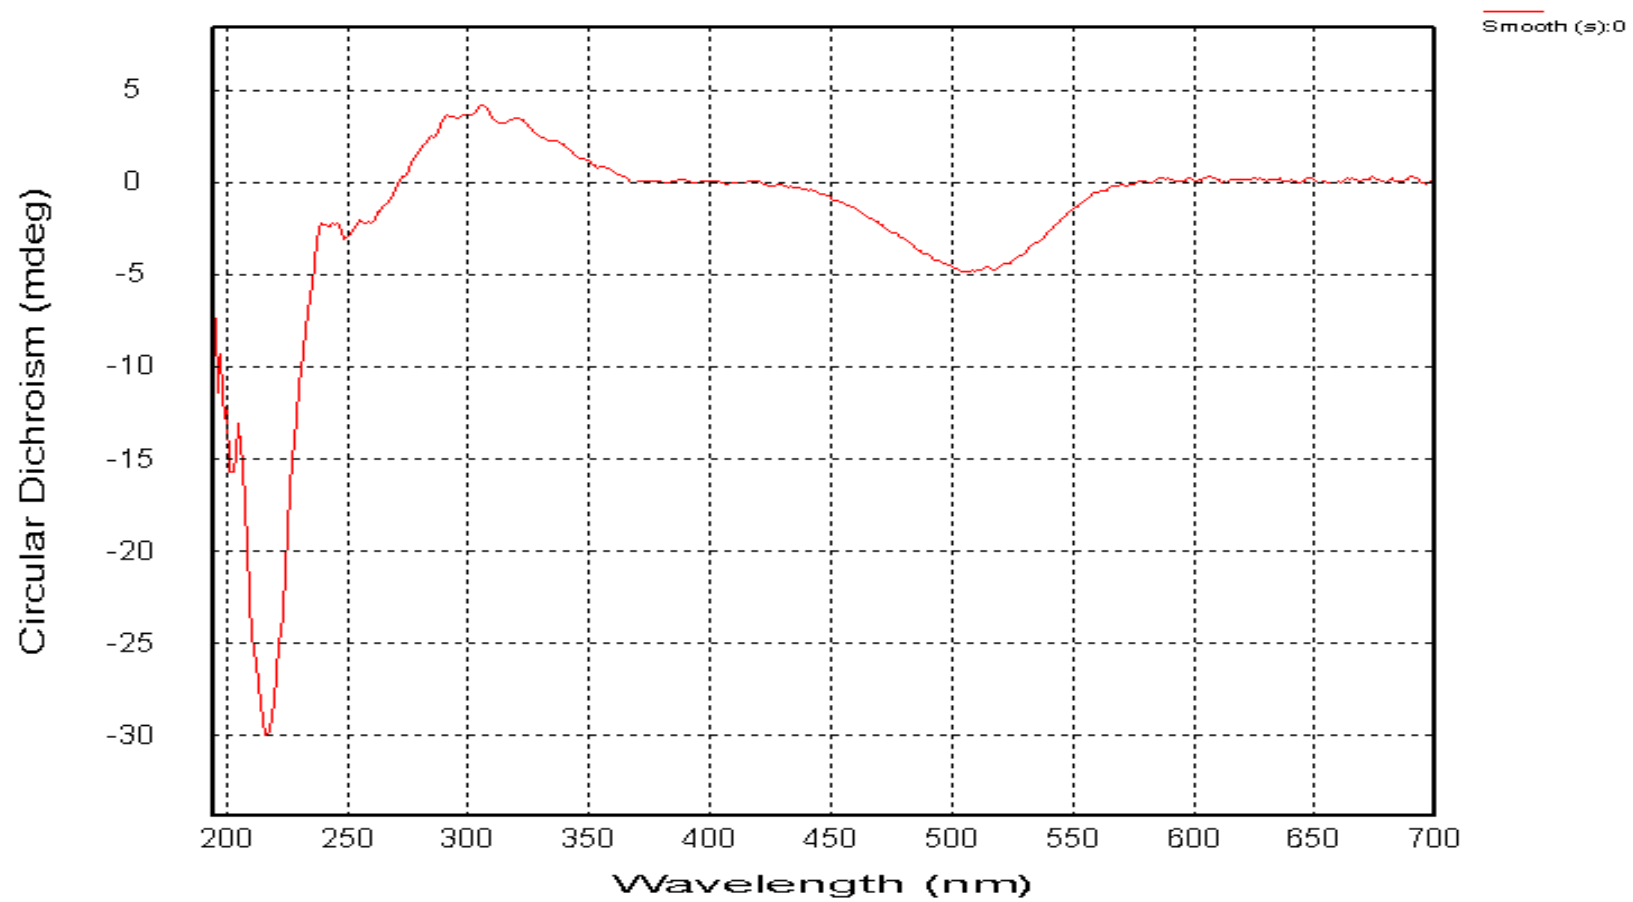

**Figure S11.**  $[\alpha]_D$  value of cimyunnin E (1)

Optical rotation measurement

Model : P-1020 (A060460638)

| No.  | Sample   | Mode   | Data      | Monitor<br>Blank  | Temp.<br>Cell<br>Temp Point | Date<br>Comment<br>Sample Name                        | Light<br>Filter<br>Operator | Cycle Time<br>Integ Time |
|------|----------|--------|-----------|-------------------|-----------------------------|-------------------------------------------------------|-----------------------------|--------------------------|
| No.1 | 16 (1/3) | Sp.Rot | -304.0000 | -0.0304<br>0.0000 | 23.6<br>10.00<br>Cell       | Thu Oct 29 19:24:26 2015<br>0:00100g/mL MeOH<br>KYS51 | Na<br>589nm                 | 2 sec<br>10 sec          |
| No.2 | 16 (2/3) | Sp.Rot | -302.0000 | -0.0302<br>0.0000 | 23.6<br>10.00<br>Cell       | Thu Oct 29 19:24:39 2015<br>0.00100g/mL MeOH<br>KYS51 | Na<br>589nm                 | 2 sec<br>10 sec          |
| No.3 | 16 (3/3) | Sp.Rot | -306.0000 | -0.0306<br>0.0000 | 23.6<br>10.00<br>Cell       | Thu Oct 29 19:24:53 2015<br>0.00100g/mL MeOH<br>KYS51 | Na<br>589nm                 | 2 sec<br>10 sec          |

*-304.0000°*

**Figure S12.**  $^1\text{H}$  (600 Hz) NMR Spectrum of cimicifine B (**2**) in Pyridine- $d_5$

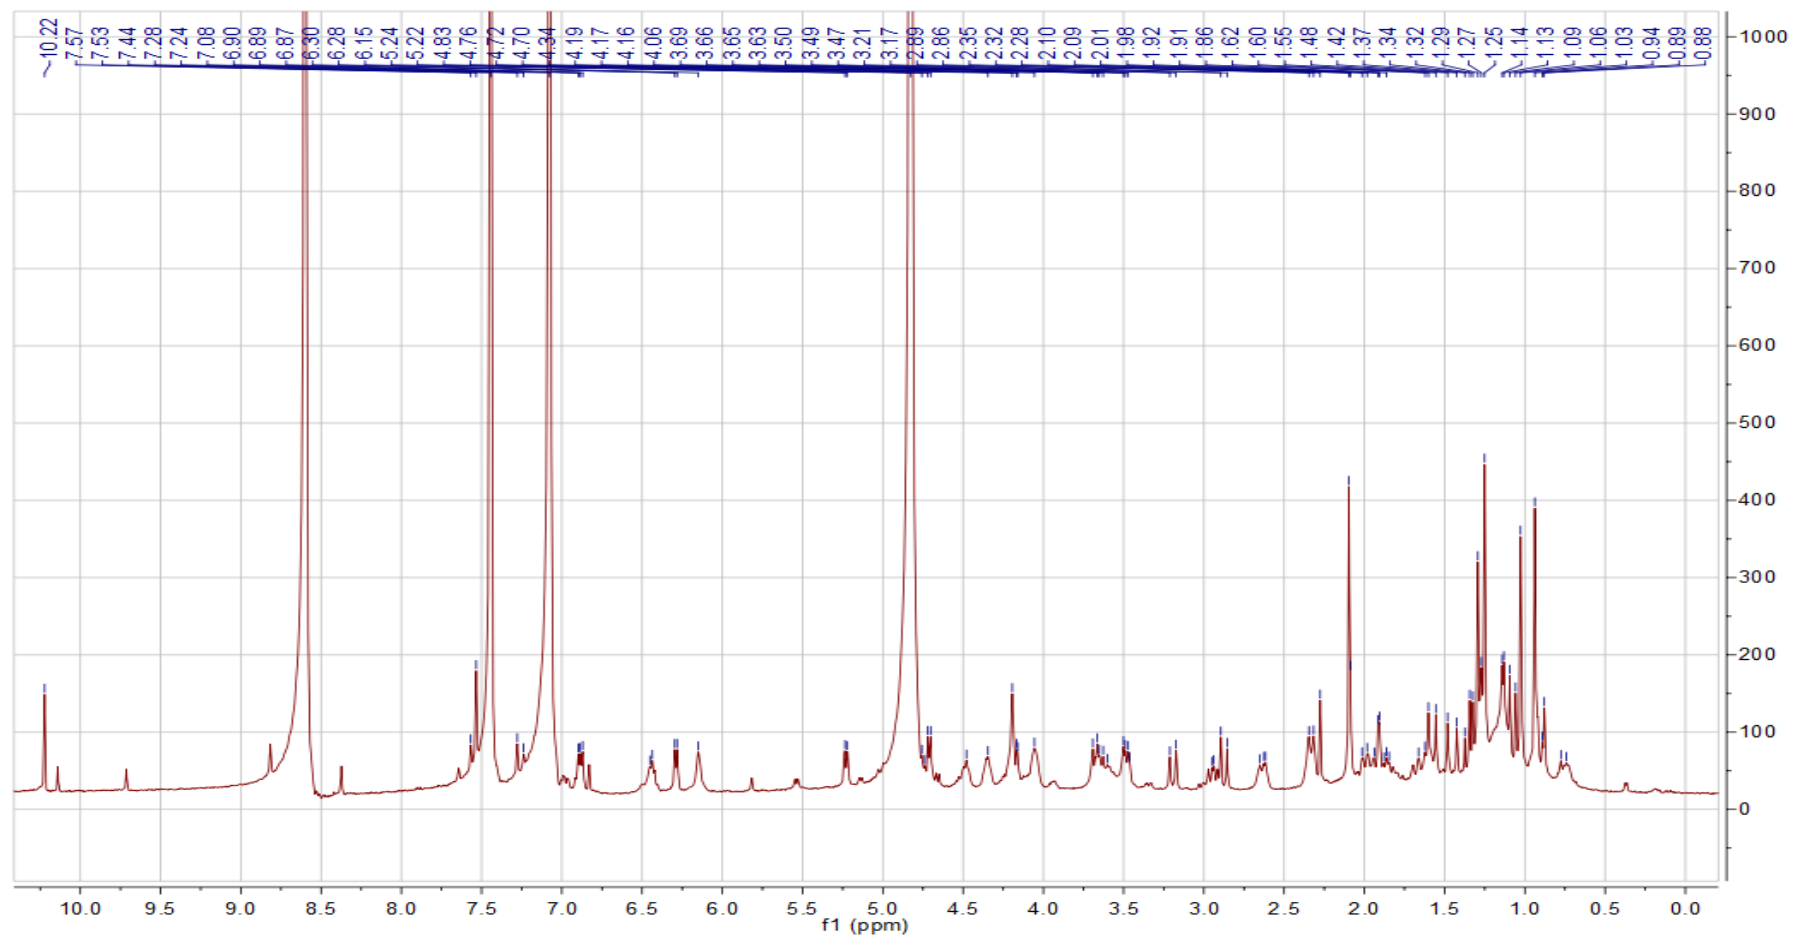

**Figure S13.**  $^{13}\text{C}$  (150 Hz) NMR Spectrum of cimicifine B (**2**) in Pyridine- $d_5$

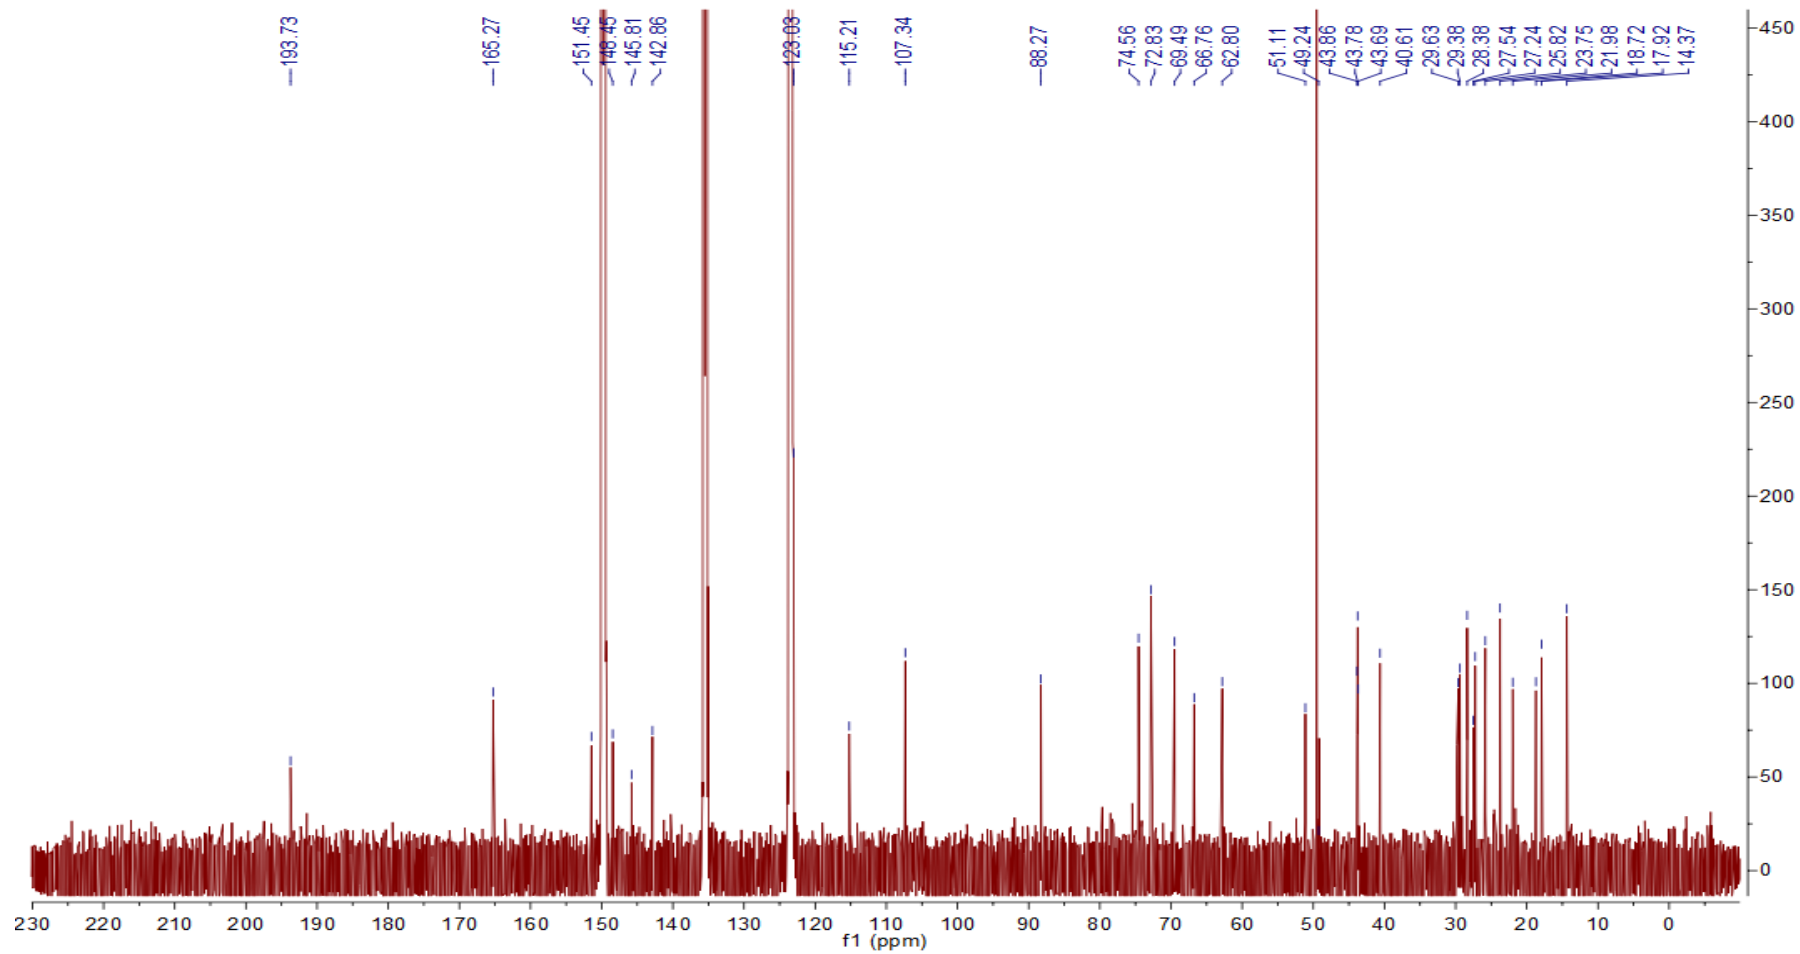

**Figure S14.** HSQC (600 Hz) Spectrum of camicifine B (**2**) in Pyridine-*d*<sub>5</sub>

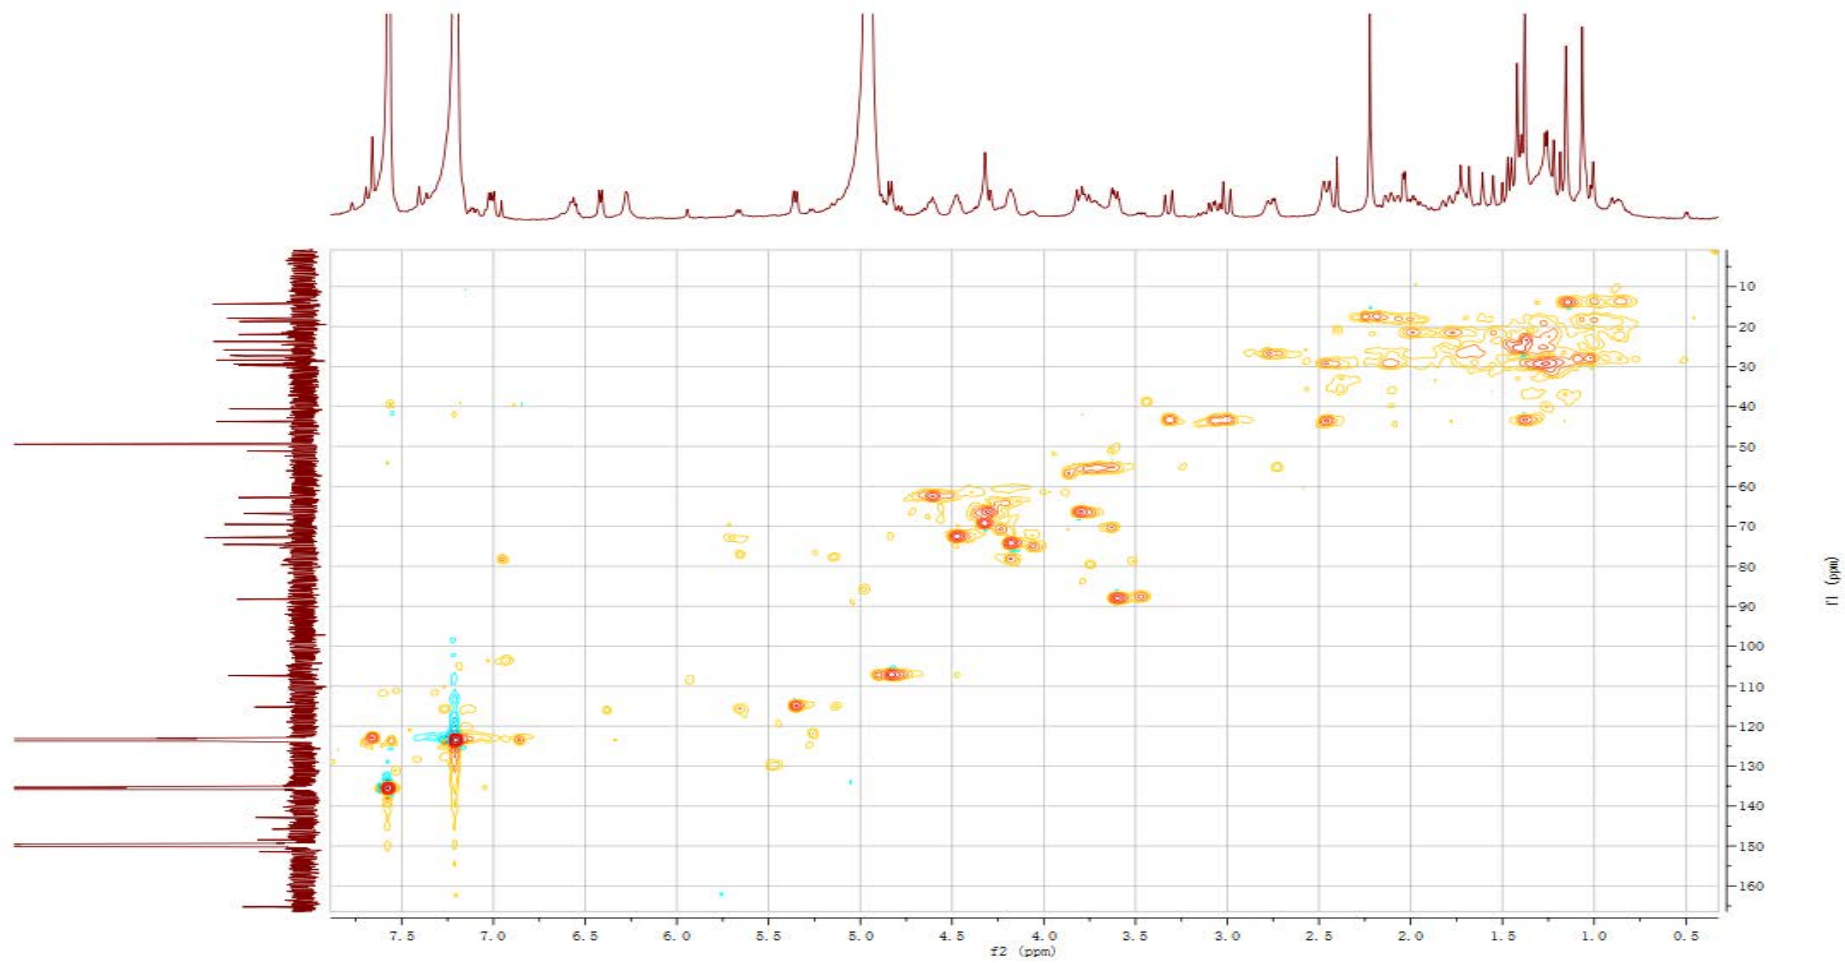



**Figure S15.** HMBC (600 Hz) Spectrum of cimicifine B (**2**) in Pyridine-*d*<sub>5</sub>

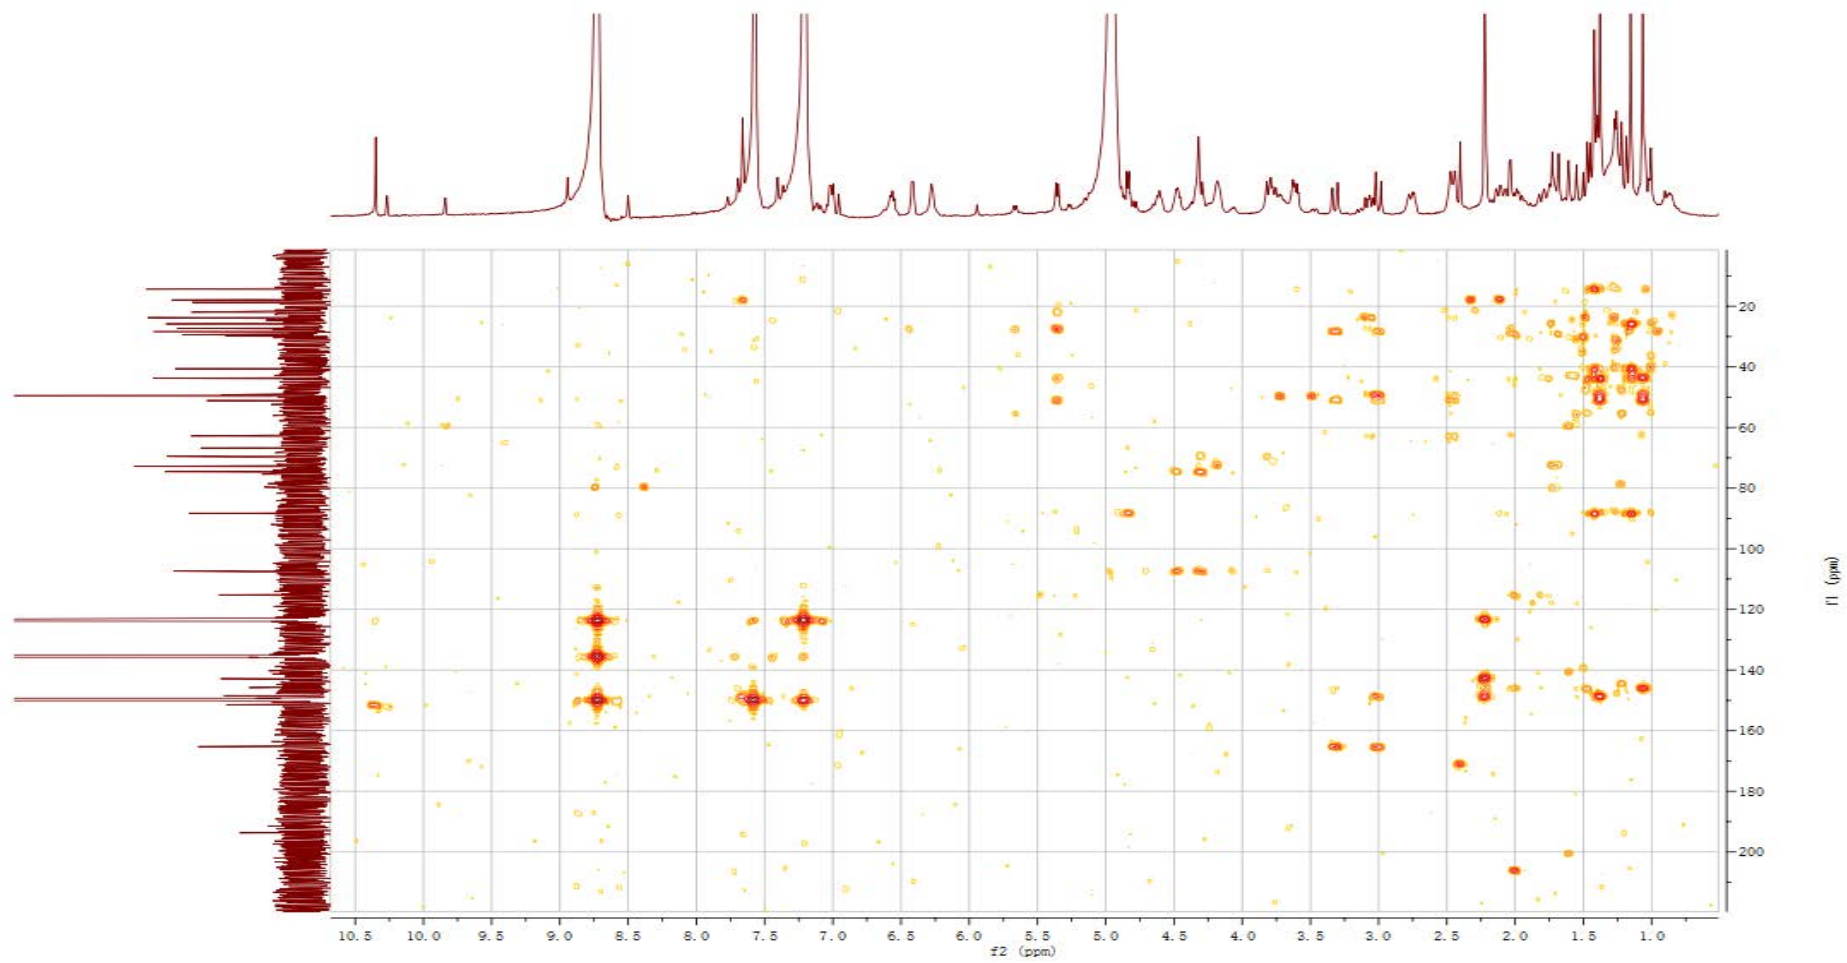

**Figure S16.**  $^1\text{H}$ - $^1\text{H}$  COSY (600 Hz) Spectrum of cimicifine B (**2**) in Pyridine- $d_5$

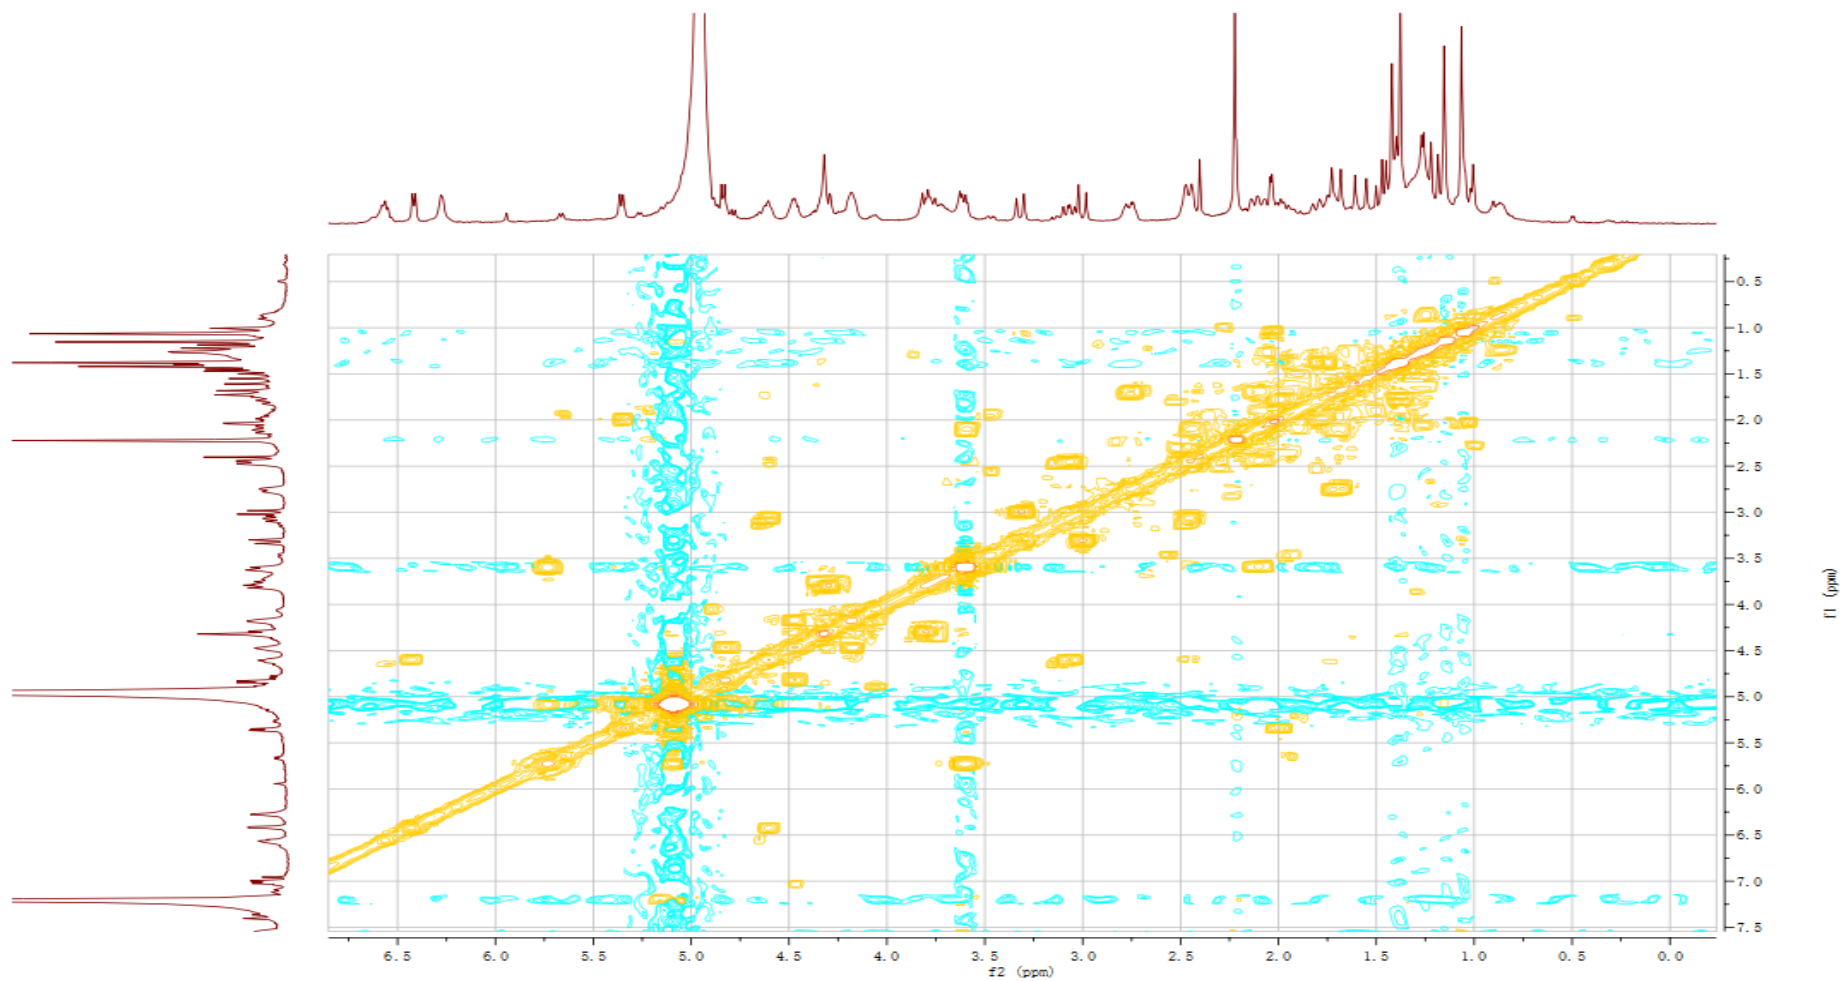

**Figure S17.** ROESY (600 Hz) Spectrum of cimicifine B (**2**) in Pyridine- $d_5$

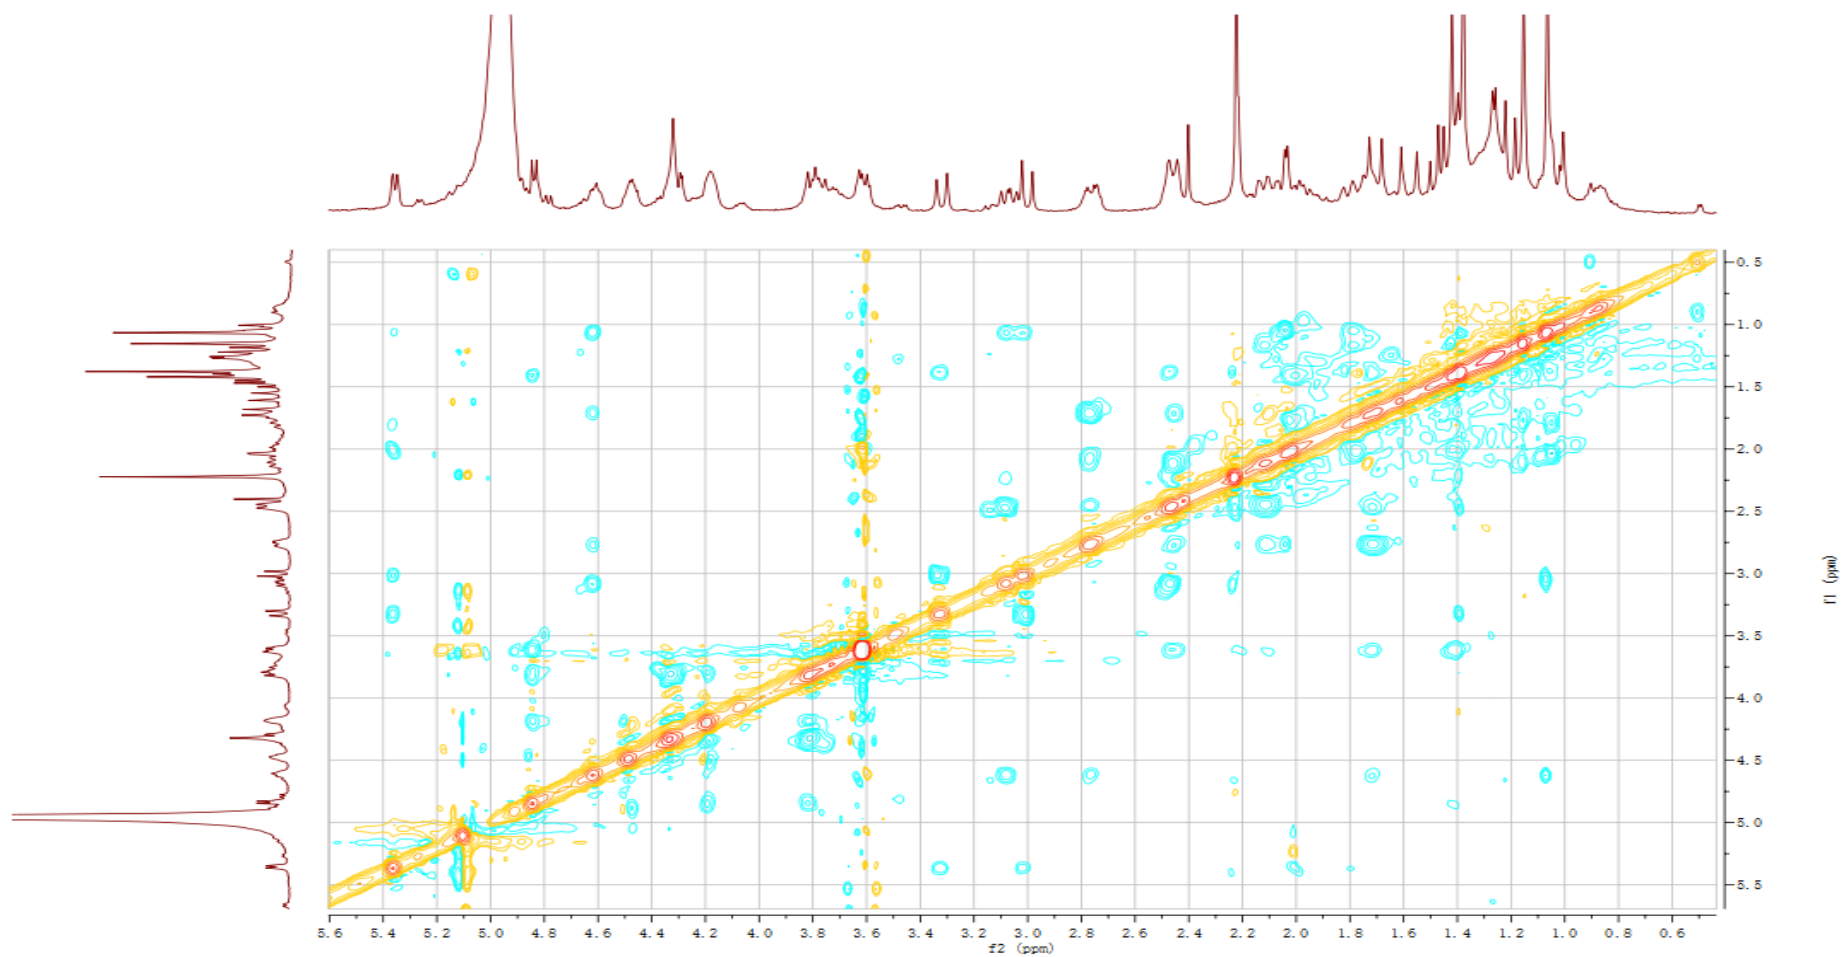

Figure S18. HREIMS of cimicifine B (2)

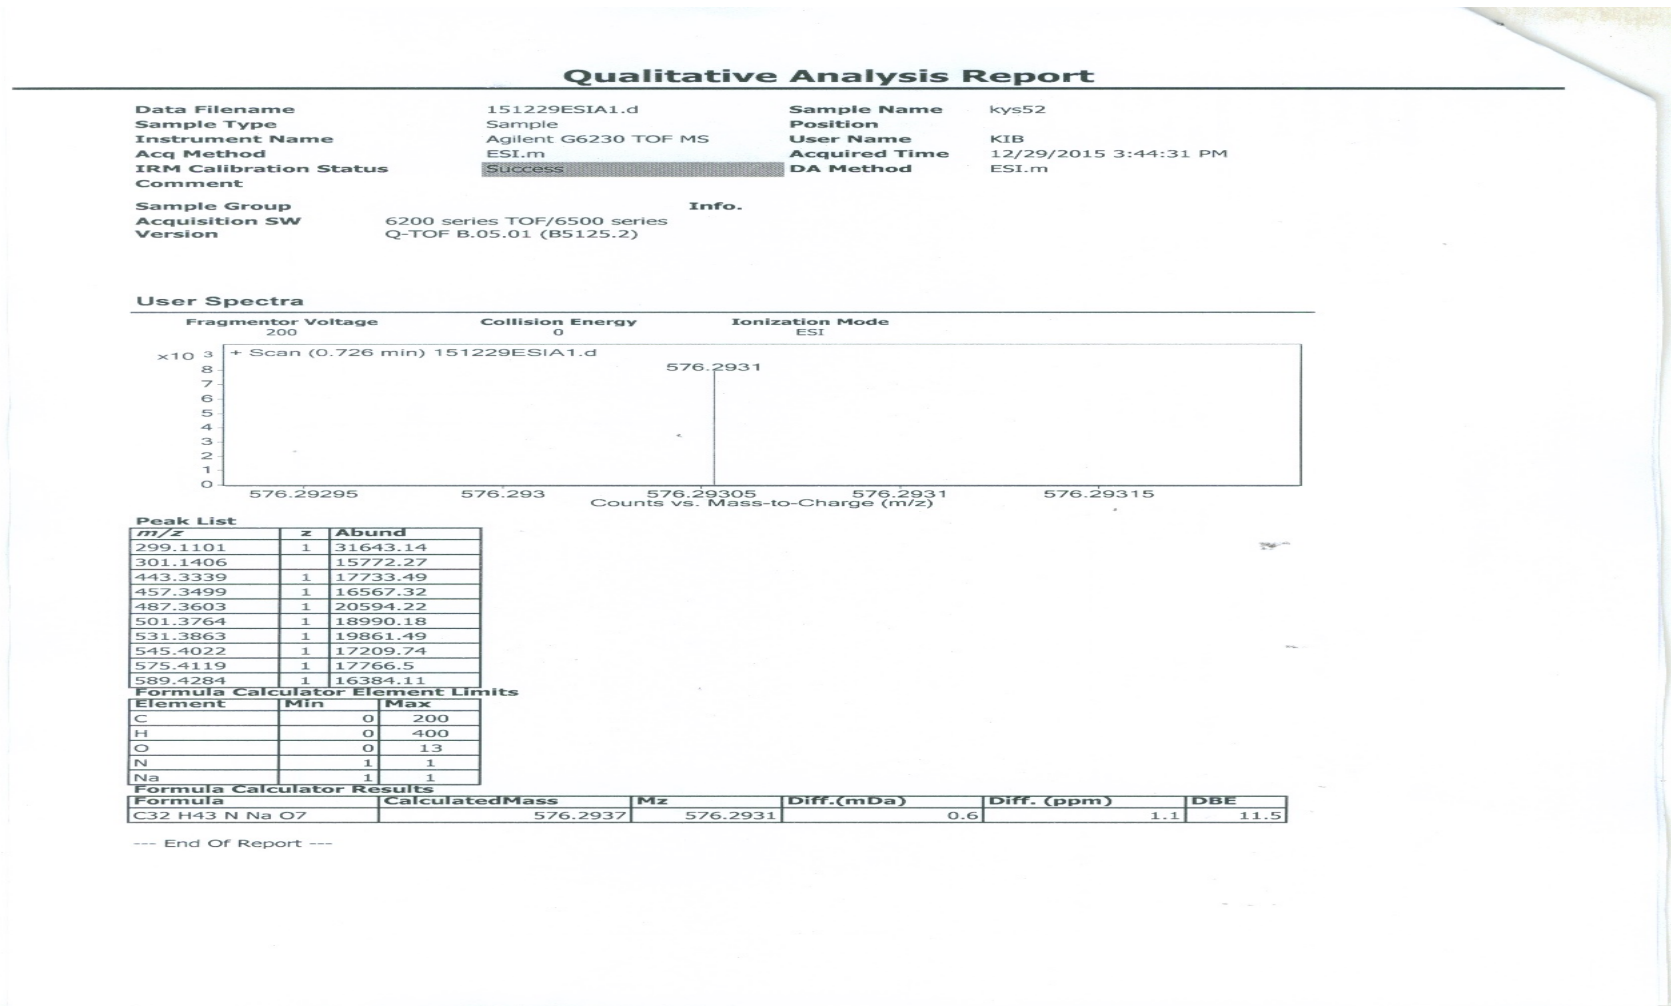

Figure S19. UV spectrum of cimicifine B (2)

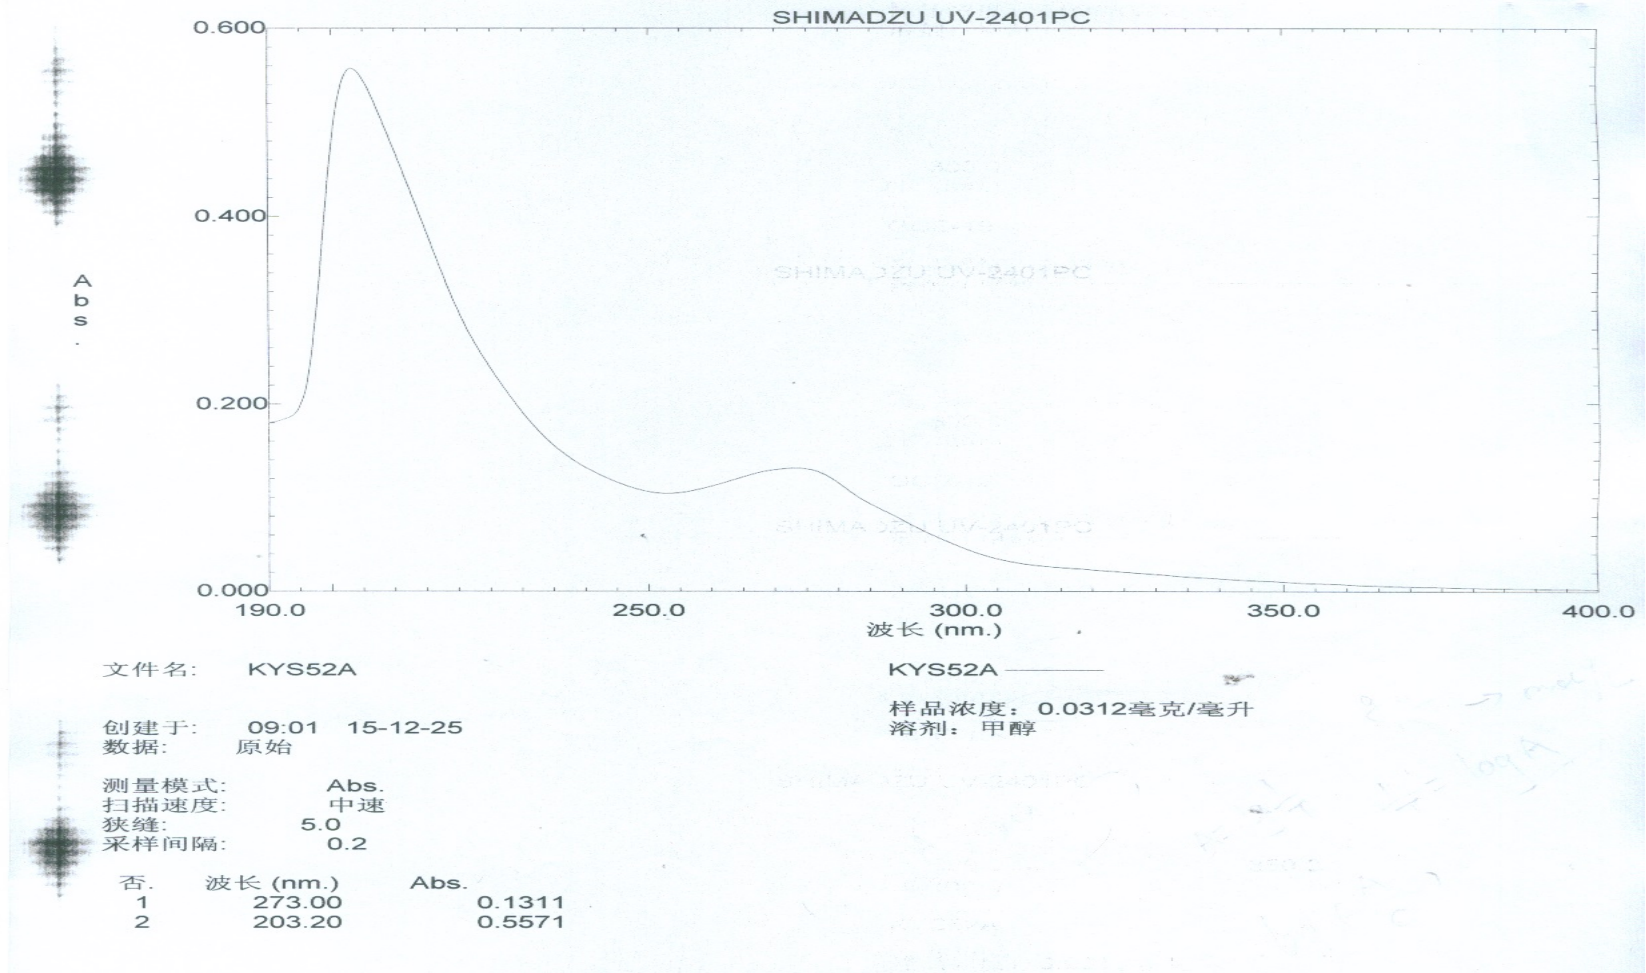

**Figure S19.** IR spectrum of cimicifine B (2)

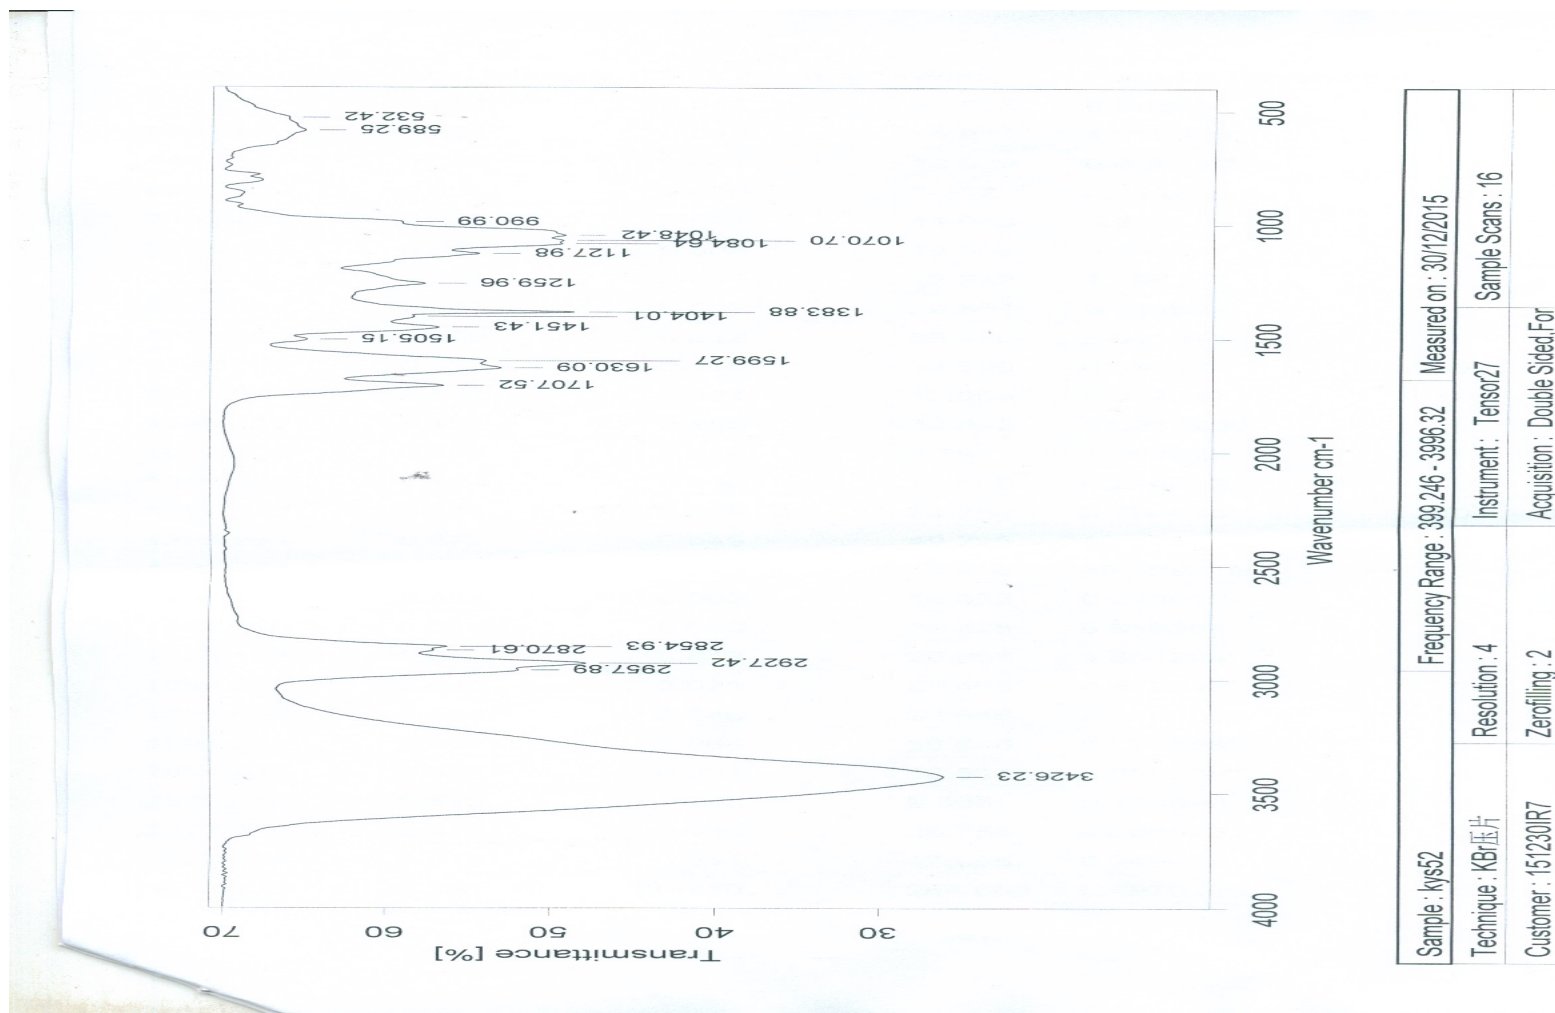

**Figure S20.**  $[\alpha]_D$  value of cimicifine B (2)

Optical rotation measurement

Model : P-1020 (A060460638)

| No.  | Sample  | Mode   | Data    | Monitor<br>Blank  | Temp.<br>Cell<br>Temp Point | Date<br>Comment<br>Sample Name                         | Light<br>Filter<br>Operator | Cycle Time<br>Integ Time |
|------|---------|--------|---------|-------------------|-----------------------------|--------------------------------------------------------|-----------------------------|--------------------------|
| No.1 | 3 (1/3) | Sp.Rot | -4.7690 | -0.0031<br>0.0000 | 19.0<br>50.00<br>Cell       | Tue Dec 22 16:18:30 2015<br>0.00130g/mL MeOH<br>KYS52A | Na<br>589nm                 | 2 sec<br>10 sec          |
| No.2 | 3 (2/3) | Sp.Rot | -4.9230 | -0.0032<br>0.0000 | 19.0<br>50.00<br>Cell       | Tue Dec 22 16:18:43 2015<br>0.00130g/mL MeOH<br>KYS52A | Na<br>589nm                 | 2 sec<br>10 sec          |
| No.3 | 3 (3/3) | Sp.Rot | -4.9230 | -0.0032<br>0.0000 | 19.0<br>50.00<br>Cell       | Tue Dec 22 16:18:57 2015<br>0.00130g/mL MeOH<br>KYS52A | Na<br>589nm                 | 2 sec<br>10 sec          |

*-4.8718°*

**Figure S21.** Structure of 17*R*, 20*S*, 23*S*, and 24*R* counterpart of **1** and unlikely happened ROESY (←---→) correlations

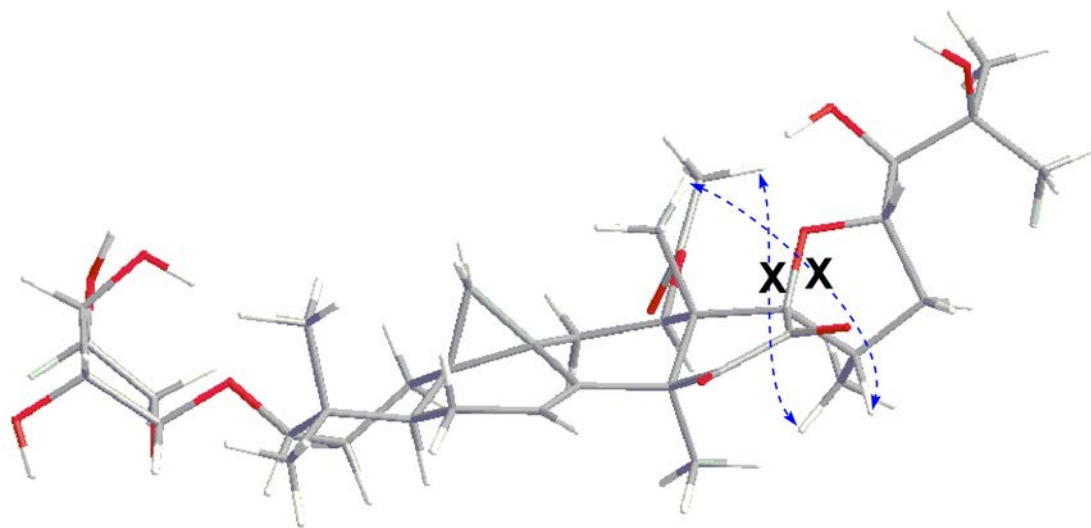



**Table S1.** Dose-related inhibitions of compounds **1** and **2** on acetylcholinesterase (AChE)

| Compounds      | Concentration ( $\mu\text{M}$ ) | Inhibitory ratio (%) | IC <sub>50</sub> ( $\mu\text{M}$ ) |
|----------------|---------------------------------|----------------------|------------------------------------|
| <b>1</b>       | 100                             | 85.844 $\pm$ 3.004   | 1.58                               |
|                | 50                              | 84.211 $\pm$ 2.912   |                                    |
|                | 30                              | 83.290 $\pm$ 4.346   |                                    |
|                | 10                              | 74.776 $\pm$ 3.849   |                                    |
|                | 3                               | 57.700 $\pm$ 2.735   |                                    |
|                | 1                               | 27.155 $\pm$ 2.559   |                                    |
|                | 0.2                             | 1.578 $\pm$ 0.564    |                                    |
| <b>2</b>       | 100                             | 84.443 $\pm$ 4.879   | 3.87                               |
|                | 50                              | 84.312 $\pm$ 3.230   |                                    |
|                | 30                              | 82.731 $\pm$ 4.276   |                                    |
|                | 10                              | 71.494 $\pm$ 3.458   |                                    |
|                | 3                               | 32.850 $\pm$ 4.021   |                                    |
|                | 1                               | 3.851 $\pm$ 1.032    |                                    |
|                | 0.2                             | 0.983 $\pm$ 0.257    |                                    |
| <b>Tacrine</b> | 2                               | 83.776 $\pm$ 0.287   | 0.16                               |
|                | 1                               | 77.690 $\pm$ 2.950   |                                    |
|                | 0.5                             | 65.138 $\pm$ 4.989   |                                    |
|                | 0.2                             | 49.498 $\pm$ 1.985   |                                    |
|                | 0.04                            | 13.553 $\pm$ 1.239   |                                    |
|                | 0.008                           | 2.884 $\pm$ 4.541    |                                    |
|                | 0.0016                          | -4.744 $\pm$ 3.439   |                                    |

All the data were represented as mean  $\pm$  SEM (n=3). 2% DMSO as the negative control (NC group). The percentage inhibition was calculated as follows: % inhibition = (NC - S)/NC  $\times$  100 (NC is the activity of the enzyme without test compound and with 2% DMSO and S is the activity of enzyme with test compound and the final concentration of DMSO is 0.1%).

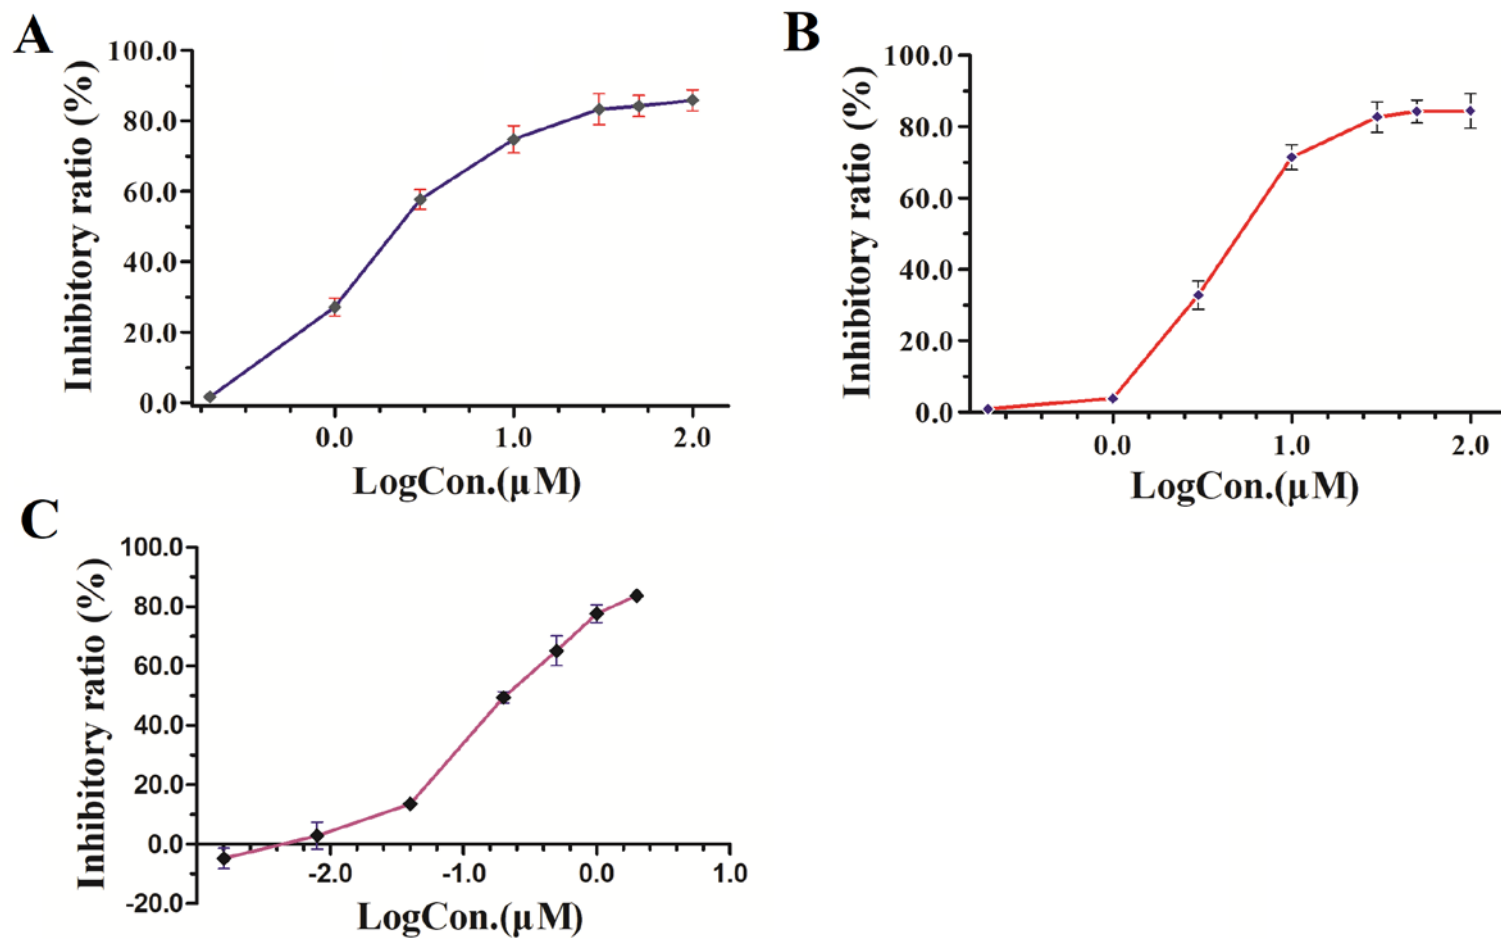

**Figure S22.** Dose-response relationships of compounds **1** (A), **2** (B), and Tacrine (C). Data points represent mean  $\pm$  SEM of three measurements. The solid curves represent a fit to the Hill equation with  $\text{IC}_{50}$  value of 1.58 (A), 3.87 (B) and 0.17 (C)  $\mu\text{M}$ , respectively, and a Hill coefficient of 1.2 (A), 1.9 (B), and 0.9 (C), respectively.

**Table S2.** The effects of compounds **1** and **2** on the NGF mediated neurite outgrowth of PC12 cells

| <b>Groups</b>             | <b>Blank</b> | <b>Negative Control (5ng/mL NGF)</b> | <b>Positive Control (50ng/mL NGF)</b> | <b>1 (10<math>\mu</math>M)</b> | <b>2 (10<math>\mu</math>M)</b> |
|---------------------------|--------------|--------------------------------------|---------------------------------------|--------------------------------|--------------------------------|
| Differentiation rates (%) | 0.34%        | 4.17%                                | 19.18%                                | 15.34%                         | 11.72%                         |

**Figure S23.** Represented pictures of the NGF mediated neurite outgrowth of PC12 cells. **1.** Blank; **2.** Negative Control (5ng/mL NGF); **3.** Positive Control (50ng/mL NGF); **4.** Compound 1 (10 $\mu$ M); **5.** Compound 2 (10 $\mu$ M). All pictures were taken after 72 h incubation.

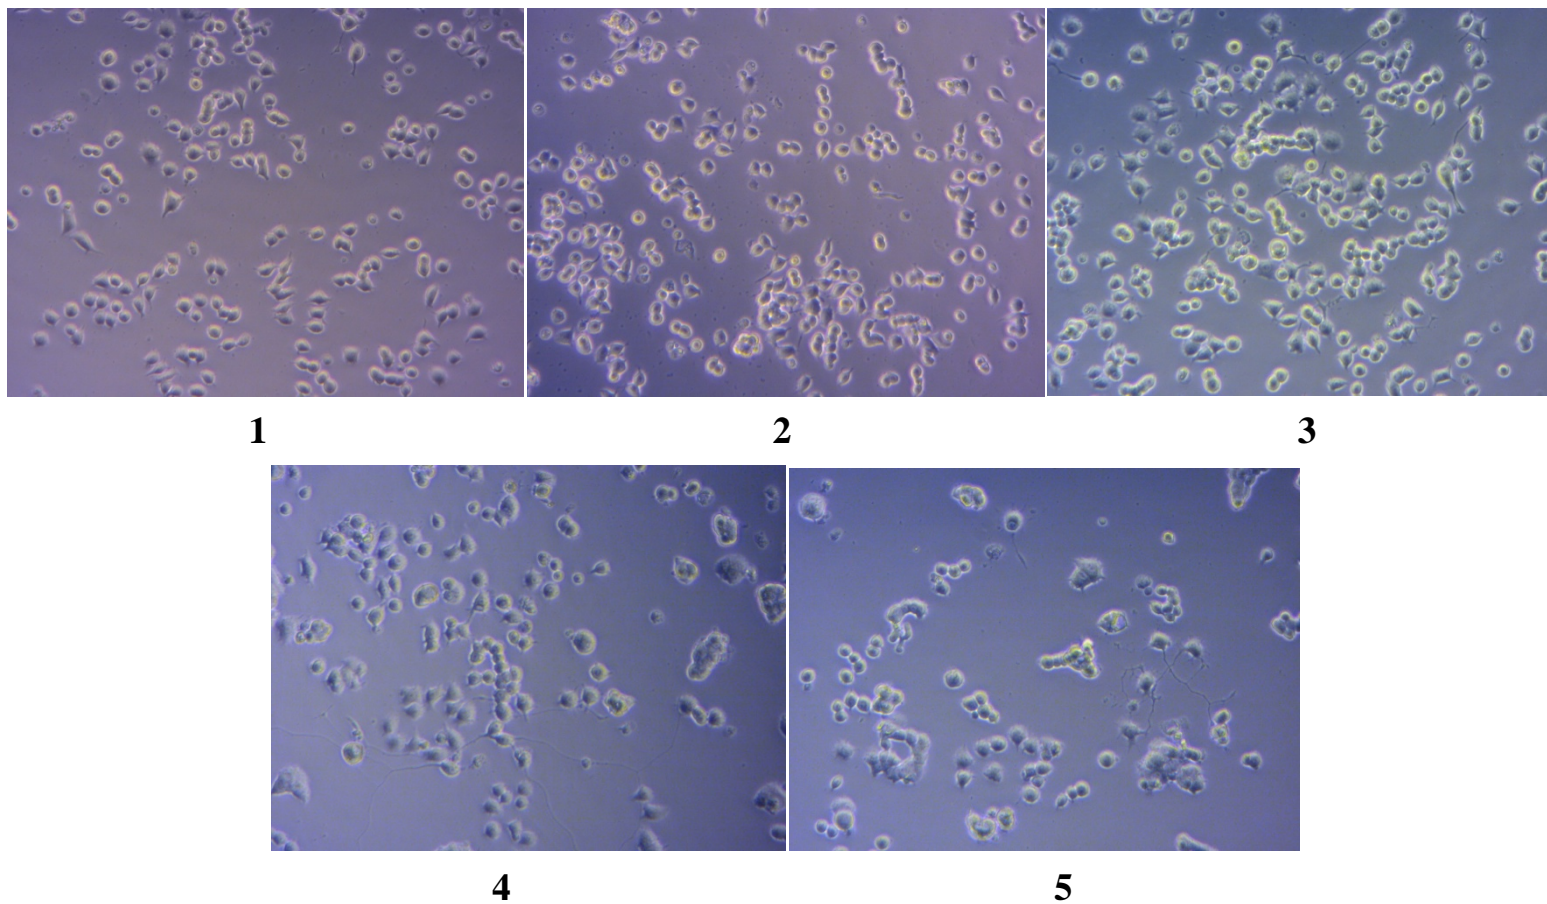

## Computational methods of 1

### 1.1 Conformational analysis

Conformational analysis was initially performed using Confab<sup>1</sup> with systematic search at MMFF94 force field for the two configurations **a** and **b** of compound **1** (Figure S23). The energies and populations of all dominative conformers were provided in Table S3.

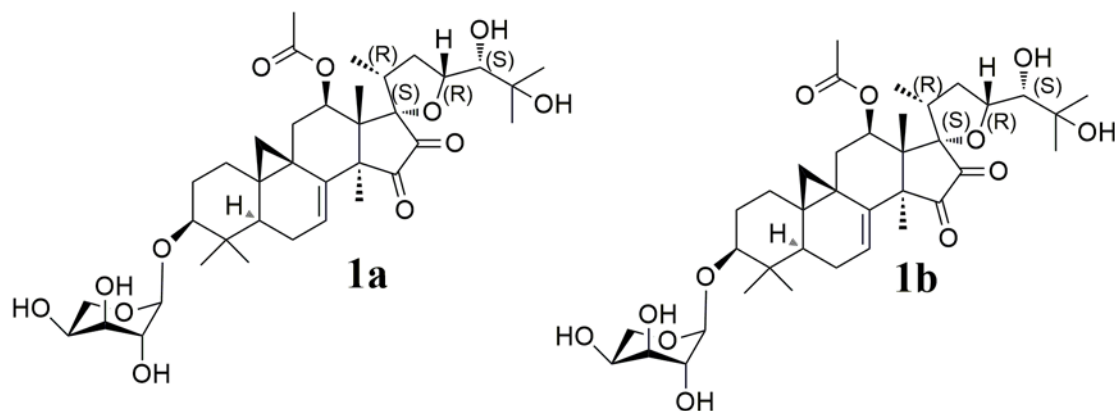

Figure S24. Chemical structure of configurations **a** and **b** of compound **1**

### 1.2 ECD calculation

The theoretical calculations were carried out using Gaussian 09<sup>2</sup>. Structures were first optimized at PM6 using semi-empirical theory method and then optimized at HF/6-31G(d) theory level. Room-temperature equilibrium populations were calculated according to Boltzmann distribution

law (eq. 1). The conformers with Boltzmann-population of over 1% were chosen and further optimized at B3LYP/6-311G(d,p) in methanol using the IEFPCM model (Table S3). Vibrational frequency analysis confirmed the stable structures.

$$\frac{N_i}{N} = \frac{g_i e^{-\frac{E_i}{k_B T}}}{\sum g_i e^{-\frac{E_i}{k_B T}}} \quad (1)$$

where  $N_i$  is the number of conformer  $i$  with energy  $E_i$  and degeneracy  $g_i$  at temperature  $T$ , and  $k_B$  is Boltzmann constant.

Under the same condition, the ECD calculation was conducted using Time-dependent Density functional theory (TD-DFT). Rotatory strengths for a total of 30 excited states were calculated. The ECD spectrum was simulated in SpecDis<sup>3</sup> by overlapping Gaussian functions for each transition according to (eq. 2):

$$\Delta\varepsilon(E) = \frac{1}{2.297 \times 10^{-39}} \times \frac{1}{\sqrt{2\pi\sigma}} \sum_i^A \Delta E_i R_i e^{-\left(\frac{E-E_i}{2\sigma}\right)^2} \quad (2)$$

where  $\sigma$  represents the width of the band at  $1/e$  height, and  $\Delta E_i$  and  $R_i$  are the excitation energies and rotatory strengths for transition  $i$ , respectively. Parameters of  $\sigma$  and UV-shift for enantiomers were 0.5eV and 1 nm, respectively.

### 1.3 References

1. Noel M OBoyle, Tim V, ermeersch, Christopher J Flynn, Anita R Maguire Maguire, and Geoffrey R Hutchison. Confab - systematic generation of diverse low-energy conformers. *Journal of Cheminformatics*, 2011, **3**, 3-8.
2. M. J. Frisch, G. W. Trucks, H. B. Schlegel, G. E. Scuseria, M. A. Robb, J. R. Cheeseman, G. Scalmani, V. Barone, B. Mennucci, G. A. Petersson, H. Nakatsuji, M. Caricato, X. Li, H. P. Hratchian, A. F. Izmaylov, J. Bloino, G. Zheng, J. L. Sonnenberg, M. Hada, M. Ehara, K. Toyota, R. Fukuda, J. Hasegawa, M. Ishida, T. Nakajima, Y. Honda, O. Kitao, H. Nakai, T. Vreven, J. A. Montgomery, Jr., J. E. Peralta, F. Ogliaro, M. Bearpark, J. J. Heyd, E. Brothers, K. N. Kudin, V. N. Staroverov, R. Kobayashi, J. Normand, K. Raghavachari, A. Rendell, J. C. Burant, S. S. Iyengar, J. Tomasi, M. Cossi, N. Rega, J. M. Millam, M. Klene, J. E. Knox, J. B. Cross, V. Bakken, C. Adamo, J. Jaramillo, R. Gomperts, R. E. Stratmann, O. Yazyev, A. J. Austin, R. Cammi, C. Pomelli, J. W. Ochterski, R. L. Martin, K. Morokuma, V. G. Zakrzewski, G. A. Voth, P. Salvador, J. J. Dannenberg, S. Dapprich, A. D. Daniels, O. Farkas, J. B. Foresman, J. V. Ortiz, J. Cioslowski, and D. J. Fox. Gaussian 09 Revision D.01. Gaussian Inc. Wallingford CT 2009.
3. Torsten Bruhn, Anu Schaumlffl, Anu Schaumlffl, Yasmin Hemberger, Yasmin Hemberger, Gerhard Bringmann, and Gerhard Bringmann. Specdis: quantifying the comparison of calculated and experimental electronic circular dichroism spectra. *Chirality*, 2013, **25**, 243-249.

## Energies and Coordinates

### 2.1 Energies at MMFF94 force field

Systematic conformational search was performed by Confab program at MMFF94 force field. Conformers for each configuration were obtained with filtration by RMSD threshold of 2.0 Å.

**Table S3.** Energies of compound **1** at MMFF94 force field.

| Configuration | Conformer | Energy (kcal/mol) |
|---------------|-----------|-------------------|
| a             | 1         | 323.27            |
|               | 2         | 326.43            |
|               | 3         | 329.59            |
|               | 4         | 334.05            |
|               | 5         | 343.68            |
|               | 6         | 344.90            |
|               | 7         | 346.19            |
|               | 8         | 347.20            |
|               | 9         | 348.80            |
|               | 10        | 351.99            |
|               | 11        | 358.27            |
|               | 12        | 363.11            |
| b             | 1         | 339.44            |



|   |        |
|---|--------|
| 2 | 345.35 |
| 3 | 348.36 |
| 4 | 354.33 |
| 5 | 359.80 |
| 6 | 363.16 |
| 7 | 369.10 |
| 8 | 371.19 |

---

## 2.2 Energies at B3LYP theory level

Structures for ECD calculations were optimized at B3LYP/6-311G(d,p) in methanol and conformers with Boltzmann-based population high than 1% were retained.

**Table S4.** Energies of compound **1** at B3LYP/6-311G(d,p) in methanol.

| Configuration | Conformer | Structure                                                                            | E (Hartree)    | E (kcal/mol) | Population (%) |
|---------------|-----------|--------------------------------------------------------------------------------------|----------------|--------------|----------------|
| a             | 2         | 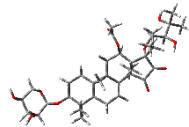   | -2345.70091427 | -1471949.54  | 74.04          |
| a             | 9         |   | -2345.69992561 | -1471948.91  | 25.96          |
| b             | 1         |  | -2345.70079978 | -1471949.46  | 72.17          |

---

b

4

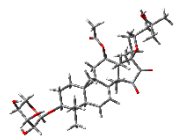

-2345.69990069

-1471948.90

27.83

---

## 2.3 Coordinates at B3LYP theory level

**Table S5.** Standard orientations of compound **1** at B3LYP/6-311G(d,p) level in methanol.

| Center<br>Number | Atomic<br>Number | Atomic<br>Type | Coordinates (Angstroms) |           |           |
|------------------|------------------|----------------|-------------------------|-----------|-----------|
|                  |                  |                | X                       | Y         | Z         |
| 1                | 8                | 0              | -4.496612               | -0.037145 | 0.651423  |
| 2                | 8                | 0              | -2.226570               | 2.157494  | -1.257128 |
| 3                | 8                | 0              | 6.040172                | -0.431911 | 0.231225  |
| 4                | 8                | 0              | 6.853357                | 1.192823  | 1.728855  |
| 5                | 8                | 0              | -2.193590               | 3.681789  | 0.408191  |
| 6                | 8                | 0              | 8.926738                | -0.828627 | 2.276618  |
| 7                | 8                | 0              | 8.655412                | 0.183966  | -1.214638 |
| 8                | 8                | 0              | 9.585390                | 2.557965  | -0.347567 |
| 9                | 6                | 0              | 0.267743                | -0.217309 | -0.484518 |
| 10               | 6                | 0              | 1.796432                | -0.251803 | -0.335128 |
| 11               | 6                | 0              | 1.185367                | 0.001787  | -1.687561 |
| 12               | 6                | 0              | 2.441743                | -1.607609 | -0.018870 |
| 13               | 6                | 0              | -1.944244               | -1.438096 | -0.085533 |
| 14               | 6                | 0              | -0.451318               | -1.536949 | -0.380079 |
| 15               | 6                | 0              | -2.582506               | -0.212174 | -0.881833 |
| 16               | 6                | 0              | -0.493629               | 0.989783  | 0.065505  |
| 17               | 6                | 0              | 2.483072                | 0.891974  | 0.400560  |
| 18               | 6                | 0              | -2.000802               | 1.080368  | -0.297334 |

|    |   |   |           |           |           |
|----|---|---|-----------|-----------|-----------|
| 19 | 6 | 0 | -4.142282 | -0.382724 | -0.705624 |
| 20 | 6 | 0 | 3.987302  | -1.631679 | -0.297775 |
| 21 | 6 | 0 | 1.690854  | -2.788750 | -0.663106 |
| 22 | 6 | 0 | -2.864472 | -2.566156 | -0.515388 |
| 23 | 6 | 0 | -4.268844 | -1.924253 | -0.738273 |
| 24 | 6 | 0 | 0.200832  | -2.699370 | -0.477868 |
| 25 | 6 | 0 | 3.995498  | 0.902001  | 0.151776  |
| 26 | 6 | 0 | 4.620528  | -0.449834 | 0.488730  |
| 27 | 6 | 0 | -2.111769 | -1.420944 | 1.476228  |
| 28 | 6 | 0 | -5.232954 | 0.310414  | -1.600245 |
| 29 | 6 | 0 | -2.229993 | -0.418341 | -2.375702 |
| 30 | 6 | 0 | -5.748979 | 0.696076  | 0.738991  |
| 31 | 1 | 0 | -5.585374 | 1.437842  | 1.520420  |
| 32 | 6 | 0 | 4.594131  | -2.942379 | 0.242047  |
| 33 | 6 | 0 | 4.323450  | -1.511834 | -1.798298 |
| 34 | 6 | 0 | -5.897785 | 1.317174  | -0.642907 |
| 35 | 6 | 0 | -4.906738 | 0.949468  | -2.951382 |
| 36 | 6 | 0 | -2.298114 | 3.414956  | -0.766948 |
| 37 | 6 | 0 | 6.867631  | -0.171569 | 1.330868  |
| 38 | 6 | 0 | 8.287923  | -0.670023 | 1.007846  |
| 39 | 6 | 0 | -2.535308 | 4.417328  | -1.865544 |
| 40 | 6 | 0 | 9.100074  | 0.297477  | 0.132686  |
| 41 | 6 | 0 | 7.470684  | 2.082345  | 0.789692  |
| 42 | 6 | 0 | 8.950210  | 1.735573  | 0.633541  |
| 43 | 1 | 0 | 1.223661  | -0.778300 | -2.438352 |

|    |   |   |           |           |           |
|----|---|---|-----------|-----------|-----------|
| 44 | 1 | 0 | 1.238429  | 1.008537  | -2.089468 |
| 45 | 1 | 0 | 2.333439  | -1.734587 | 1.069166  |
| 46 | 1 | 0 | -0.410964 | 1.005685  | 1.156194  |
| 47 | 1 | 0 | -0.023100 | 1.909291  | -0.277345 |
| 48 | 1 | 0 | 2.067525  | 1.857775  | 0.108945  |
| 49 | 1 | 0 | 2.298379  | 0.783129  | 1.477502  |
| 50 | 1 | 0 | -2.561058 | 1.338237  | 0.597852  |
| 51 | 1 | 0 | 1.928940  | -2.857382 | -1.731437 |
| 52 | 1 | 0 | 2.041280  | -3.726023 | -0.225889 |
| 53 | 1 | 0 | -0.352268 | -3.628515 | -0.423609 |
| 54 | 1 | 0 | 4.205384  | 1.148569  | -0.893589 |
| 55 | 1 | 0 | 4.469136  | 1.671057  | 0.765215  |
| 56 | 1 | 0 | 4.473606  | -0.647569 | 1.560205  |
| 57 | 1 | 0 | -3.151145 | -1.379808 | 1.793220  |
| 58 | 1 | 0 | -1.596138 | -0.567036 | 1.913712  |
| 59 | 1 | 0 | -1.649542 | -2.330114 | 1.863644  |
| 60 | 1 | 0 | -5.969802 | -0.472170 | -1.792244 |
| 61 | 1 | 0 | -2.413075 | 0.481913  | -2.951044 |
| 62 | 1 | 0 | -2.827160 | -1.223071 | -2.818420 |
| 63 | 1 | 0 | -1.187251 | -0.693229 | -2.505761 |
| 64 | 1 | 0 | 5.403925  | -1.421933 | -1.924838 |
| 65 | 1 | 0 | 3.855817  | -0.643424 | -2.264536 |
| 66 | 1 | 0 | 5.682721  | -2.908950 | 0.170957  |
| 67 | 1 | 0 | 4.252090  | -3.808938 | -0.327366 |
| 68 | 1 | 0 | 4.326063  | -3.099424 | 1.292088  |

|    |   |   |           |           |           |
|----|---|---|-----------|-----------|-----------|
| 69 | 1 | 0 | 3.996590  | -2.399888 | -2.344031 |
| 70 | 1 | 0 | -5.374438 | 2.276739  | -0.676390 |
| 71 | 1 | 0 | -6.936257 | 1.483726  | -0.924784 |
| 72 | 1 | 0 | -5.826003 | 1.396272  | -3.340953 |
| 73 | 1 | 0 | -4.565659 | 0.223365  | -3.689417 |
| 74 | 1 | 0 | -4.162594 | 1.740384  | -2.861205 |
| 75 | 1 | 0 | 6.513528  | -0.707697 | 2.216936  |
| 76 | 1 | 0 | 8.200589  | -1.628399 | 0.486345  |
| 77 | 1 | 0 | -2.357126 | 5.421306  | -1.485789 |
| 78 | 1 | 0 | -3.571245 | 4.343428  | -2.206777 |
| 79 | 1 | 0 | -1.888834 | 4.212952  | -2.719744 |
| 80 | 1 | 0 | 10.159906 | 0.010925  | 0.198331  |
| 81 | 1 | 0 | 6.972957  | 2.029980  | -0.182814 |
| 82 | 1 | 0 | 7.344414  | 3.086230  | 1.198776  |
| 83 | 1 | 0 | 9.446972  | 1.822504  | 1.605755  |
| 84 | 1 | 0 | 9.781882  | -1.247123 | 2.129278  |
| 85 | 1 | 0 | 9.001783  | 0.960888  | -1.673262 |
| 86 | 1 | 0 | 9.510073  | 3.480681  | -0.081246 |
| 87 | 8 | 0 | -5.283157 | -2.574244 | -0.820723 |
| 88 | 8 | 0 | -2.673167 | -3.749880 | -0.629059 |
| 89 | 8 | 0 | -7.256232 | 1.081327  | 3.135759  |
| 90 | 1 | 0 | -7.897895 | 1.525604  | 3.701135  |
| 91 | 8 | 0 | -7.523589 | -0.946626 | 0.163207  |
| 92 | 6 | 0 | -8.950259 | -0.577051 | 2.614198  |
| 93 | 6 | 0 | -7.980029 | 0.467695  | 2.049734  |

|     |   |   |           |           |           |
|-----|---|---|-----------|-----------|-----------|
| 94  | 6 | 0 | -6.878373 | -0.241471 | 1.221470  |
| 95  | 1 | 0 | -6.399251 | -0.948536 | 1.910741  |
| 96  | 6 | 0 | -8.742206 | 1.537207  | 1.258981  |
| 97  | 1 | 0 | -9.478542 | -1.095863 | 1.813535  |
| 98  | 1 | 0 | -9.689395 | -0.090013 | 3.257508  |
| 99  | 1 | 0 | -8.407101 | -1.313659 | 3.211452  |
| 100 | 1 | 0 | -9.200422 | 1.109819  | 0.364796  |
| 101 | 1 | 0 | -8.082613 | 2.354215  | 0.961576  |
| 102 | 1 | 0 | -9.538753 | 1.958100  | 1.879825  |
| 103 | 1 | 0 | -6.908523 | -1.610793 | -0.181707 |

---

**Conformer a-9**

---

| Center<br>Number | Atomic<br>Number | Atomic<br>Type | Coordinates (Angstroms) |           |           |
|------------------|------------------|----------------|-------------------------|-----------|-----------|
|                  |                  |                | X                       | Y         | Z         |
| 1                | 8                | 0              | -4.659111               | -0.067296 | 0.498750  |
| 2                | 8                | 0              | -2.274760               | 2.419146  | -0.971965 |
| 3                | 8                | 0              | 5.911382                | -0.514208 | 0.234178  |
| 4                | 8                | 0              | 6.762171                | 1.029382  | 1.796813  |
| 5                | 8                | 0              | -2.226802               | 3.672069  | 0.905350  |
| 6                | 8                | 0              | 8.751031                | -1.075022 | 2.308227  |
| 7                | 8                | 0              | 8.568030                | 0.042046  | -1.158291 |
| 8                | 8                | 0              | 9.558468                | 2.357929  | -0.215473 |
| 9                | 6                | 0              | 0.159808                | -0.087941 | -0.532418 |
| 10               | 6                | 0              | 1.683386                | -0.172027 | -0.358265 |
| 11               | 6                | 0              | 1.109078                | 0.313304  | -1.662346 |
| 12               | 6                | 0              | 2.303704                | -1.571902 | -0.256575 |



|    |   |   |           |           |           |
|----|---|---|-----------|-----------|-----------|
| 13 | 6 | 0 | -2.079291 | -1.320924 | -0.396806 |
| 14 | 6 | 0 | -0.579497 | -1.393833 | -0.668742 |
| 15 | 6 | 0 | -2.679477 | 0.032890  | -0.987010 |
| 16 | 6 | 0 | -0.600471 | 1.021273  | 0.196576  |
| 17 | 6 | 0 | 2.369776  | 0.824671  | 0.566433  |
| 18 | 6 | 0 | -2.095153 | 1.201880  | -0.185855 |
| 19 | 6 | 0 | -4.244992 | -0.143487 | -0.890105 |
| 20 | 6 | 0 | 3.855190  | -1.577719 | -0.504328 |
| 21 | 6 | 0 | 1.553286  | -2.618898 | -1.102570 |
| 22 | 6 | 0 | -3.000419 | -2.346188 | -1.035547 |
| 23 | 6 | 0 | -4.378685 | -1.642753 | -1.257050 |
| 24 | 6 | 0 | 0.060160  | -2.534978 | -0.941907 |
| 25 | 6 | 0 | 3.884634  | 0.854226  | 0.338372  |
| 26 | 6 | 0 | 4.488506  | -0.542789 | 0.468023  |
| 27 | 6 | 0 | -2.282262 | -1.567457 | 1.139740  |
| 28 | 6 | 0 | -5.293290 | 0.737981  | -1.639468 |
| 29 | 6 | 0 | -2.284837 | 0.078465  | -2.484305 |
| 30 | 6 | 0 | -5.708723 | 0.902157  | 0.718944  |
| 31 | 1 | 0 | -5.408533 | 1.499738  | 1.582436  |
| 32 | 6 | 0 | 4.431932  | -2.966496 | -0.162797 |
| 33 | 6 | 0 | 4.224843  | -1.232394 | -1.961230 |
| 34 | 6 | 0 | -5.743650 | 1.731150  | -0.560413 |
| 35 | 6 | 0 | -5.004217 | 1.414604  | -2.979416 |
| 36 | 6 | 0 | -2.311300 | 3.590448  | -0.298557 |
| 37 | 6 | 0 | 6.729053  | -0.321498 | 1.354125  |

|    |   |   |           |           |           |
|----|---|---|-----------|-----------|-----------|
| 38 | 6 | 0 | 8.136342  | -0.860020 | 1.035814  |
| 39 | 6 | 0 | -2.470334 | 4.754073  | -1.240781 |
| 40 | 6 | 0 | 8.993888  | 0.102826  | 0.198827  |
| 41 | 6 | 0 | 7.416493  | 1.923021  | 0.887422  |
| 42 | 6 | 0 | 8.885403  | 1.531561  | 0.736693  |
| 43 | 1 | 0 | 1.156499  | -0.331642 | -2.531565 |
| 44 | 1 | 0 | 1.186884  | 1.371732  | -1.889845 |
| 45 | 1 | 0 | 2.168834  | -1.873700 | 0.793338  |
| 46 | 1 | 0 | -0.549485 | 0.847534  | 1.275571  |
| 47 | 1 | 0 | -0.107425 | 1.977051  | 0.030867  |
| 48 | 1 | 0 | 1.968734  | 1.830524  | 0.433783  |
| 49 | 1 | 0 | 2.168974  | 0.541257  | 1.608185  |
| 50 | 1 | 0 | -2.673704 | 1.328615  | 0.726610  |
| 51 | 1 | 0 | 1.818112  | -2.516965 | -2.161871 |
| 52 | 1 | 0 | 1.879623  | -3.621028 | -0.816601 |
| 53 | 1 | 0 | -0.507035 | -3.450198 | -1.055932 |
| 54 | 1 | 0 | 4.110334  | 1.253658  | -0.654966 |
| 55 | 1 | 0 | 4.360980  | 1.513352  | 1.066422  |
| 56 | 1 | 0 | 4.322151  | -0.904569 | 1.493492  |
| 57 | 1 | 0 | -3.328128 | -1.571437 | 1.433643  |
| 58 | 1 | 0 | -1.774290 | -0.805668 | 1.729737  |
| 59 | 1 | 0 | -1.835824 | -2.534186 | 1.376835  |
| 60 | 1 | 0 | -6.124118 | 0.044931  | -1.812211 |
| 61 | 1 | 0 | -2.494031 | 1.049607  | -2.916446 |
| 62 | 1 | 0 | -2.835842 | -0.669087 | -3.065149 |

|    |   |   |           |           |           |
|----|---|---|-----------|-----------|-----------|
| 63 | 1 | 0 | -1.228426 | -0.129911 | -2.622934 |
| 64 | 1 | 0 | 5.309767  | -1.160388 | -2.057062 |
| 65 | 1 | 0 | 3.792345  | -0.285605 | -2.288102 |
| 66 | 1 | 0 | 5.522105  | -2.939824 | -0.205242 |
| 67 | 1 | 0 | 4.092025  | -3.728777 | -0.866773 |
| 68 | 1 | 0 | 4.138139  | -3.280147 | 0.844587  |
| 69 | 1 | 0 | 3.881712  | -2.010464 | -2.646797 |
| 70 | 1 | 0 | -5.047084 | 2.569964  | -0.492891 |
| 71 | 1 | 0 | -6.737051 | 2.131141  | -0.759374 |
| 72 | 1 | 0 | -5.922820 | 1.903739  | -3.315383 |
| 73 | 1 | 0 | -4.713681 | 0.704789  | -3.754946 |
| 74 | 1 | 0 | -4.233549 | 2.181150  | -2.895045 |
| 75 | 1 | 0 | 6.340943  | -0.872783 | 2.216401  |
| 76 | 1 | 0 | 8.024136  | -1.800452 | 0.487242  |
| 77 | 1 | 0 | -2.432774 | 5.685195  | -0.679639 |
| 78 | 1 | 0 | -3.424853 | 4.680269  | -1.766654 |
| 79 | 1 | 0 | -1.678574 | 4.736617  | -1.992141 |
| 80 | 1 | 0 | 10.042378 | -0.221313 | 0.271860  |
| 81 | 1 | 0 | 6.927071  | 1.910854  | -0.090548 |
| 82 | 1 | 0 | 7.318824  | 2.919791  | 1.321003  |
| 83 | 1 | 0 | 9.373863  | 1.576535  | 1.715882  |
| 84 | 1 | 0 | 9.593826  | -1.517950 | 2.161178  |
| 85 | 1 | 0 | 8.942668  | 0.822940  | -1.587171 |
| 86 | 1 | 0 | 9.509445  | 3.275453  | 0.073927  |
| 87 | 8 | 0 | -5.364480 | -2.220771 | -1.629942 |

|     |   |   |           |           |           |
|-----|---|---|-----------|-----------|-----------|
| 88  | 8 | 0 | -2.822728 | -3.507611 | -1.303025 |
| 89  | 8 | 0 | -8.579506 | -0.863334 | 2.406771  |
| 90  | 1 | 0 | -8.765520 | -1.234763 | 3.276142  |
| 91  | 8 | 0 | -7.969678 | 1.335604  | 1.186560  |
| 92  | 6 | 0 | -6.628601 | 0.035623  | 3.551629  |
| 93  | 6 | 0 | -7.142850 | -0.664657 | 2.291357  |
| 94  | 6 | 0 | -7.062920 | 0.242710  | 1.029750  |
| 95  | 1 | 0 | -7.370490 | -0.376124 | 0.174691  |
| 96  | 6 | 0 | -6.485755 | -2.029844 | 2.091616  |
| 97  | 1 | 0 | -5.544708 | 0.167530  | 3.521040  |
| 98  | 1 | 0 | -6.861417 | -0.566800 | 4.434961  |
| 99  | 1 | 0 | -7.098835 | 1.013978  | 3.664810  |
| 100 | 1 | 0 | -5.402577 | -1.945637 | 2.016775  |
| 101 | 1 | 0 | -6.861913 | -2.506982 | 1.183970  |
| 102 | 1 | 0 | -6.723307 | -2.676065 | 2.942000  |
| 103 | 1 | 0 | -8.749054 | 0.948712  | 1.611287  |

---

**Conformer b-1**

---

| Center<br>Number | Atomic<br>Number | Atomic<br>Type | Coordinates (Angstroms) |           |           |
|------------------|------------------|----------------|-------------------------|-----------|-----------|
|                  |                  |                | X                       | Y         | Z         |
| 1                | 8                | 0              | 6.026306                | -0.267169 | -0.233608 |
| 2                | 6                | 0              | 3.953000                | 0.882328  | 0.356940  |
| 3                | 1                | 0              | 4.508565                | 1.532457  | 1.036394  |
| 4                | 1                | 0              | 3.946346                | 1.367948  | -0.623571 |
| 5                | 6                | 0              | 4.672160                | -0.458968 | 0.256527  |
| 6                | 1                | 0              | 4.750449                | -0.895034 | 1.260764  |

|    |   |   |           |           |           |
|----|---|---|-----------|-----------|-----------|
| 7  | 6 | 0 | 3.946781  | -1.490495 | -0.650504 |
| 8  | 6 | 0 | 2.483898  | -1.642364 | -0.095383 |
| 9  | 1 | 0 | 2.594928  | -2.006435 | 0.937363  |
| 10 | 6 | 0 | 1.745133  | -0.302719 | 0.023100  |
| 11 | 6 | 0 | 2.519417  | 0.700825  | 0.867536  |
| 12 | 1 | 0 | 2.025277  | 1.673008  | 0.885120  |
| 13 | 1 | 0 | 2.551864  | 0.344327  | 1.905382  |
| 14 | 6 | 0 | 1.662065  | -2.713384 | -0.839126 |
| 15 | 1 | 0 | 1.693118  | -2.538878 | -1.921116 |
| 16 | 1 | 0 | 2.119692  | -3.693450 | -0.688938 |
| 17 | 6 | 0 | 0.231495  | -2.773992 | -0.378347 |
| 18 | 1 | 0 | -0.268519 | -3.732703 | -0.430600 |
| 19 | 6 | 0 | -0.430818 | -1.707185 | 0.079450  |
| 20 | 6 | 0 | 0.215348  | -0.348925 | 0.149203  |
| 21 | 6 | 0 | -1.849002 | -1.782820 | 0.638487  |
| 22 | 6 | 0 | -2.665659 | -0.476070 | 0.256251  |
| 23 | 6 | 0 | -2.020202 | 0.740718  | 0.948128  |
| 24 | 1 | 0 | -2.431487 | 0.885859  | 1.942199  |
| 25 | 6 | 0 | -0.477870 | 0.640271  | 1.083007  |
| 26 | 1 | 0 | -0.075046 | 1.640903  | 0.941583  |
| 27 | 1 | 0 | -0.250782 | 0.378380  | 2.120565  |
| 28 | 6 | 0 | 3.978643  | -1.033820 | -2.122557 |
| 29 | 1 | 0 | 3.512322  | -1.778689 | -2.770701 |
| 30 | 1 | 0 | 5.012325  | -0.920750 | -2.456430 |
| 31 | 1 | 0 | 3.463418  | -0.085606 | -2.280674 |

|    |   |   |           |           |           |
|----|---|---|-----------|-----------|-----------|
| 32 | 6 | 0 | 4.689185  | -2.836979 | -0.534208 |
| 33 | 1 | 0 | 4.276470  | -3.582263 | -1.216629 |
| 34 | 1 | 0 | 4.627436  | -3.236982 | 0.483131  |
| 35 | 1 | 0 | 5.743764  | -2.711247 | -0.786280 |
| 36 | 6 | 0 | 0.888649  | 0.195231  | -1.110512 |
| 37 | 1 | 0 | 0.814036  | -0.396556 | -2.014818 |
| 38 | 1 | 0 | 0.835845  | 1.266795  | -1.274459 |
| 39 | 6 | 0 | -2.579804 | -0.330280 | -1.287550 |
| 40 | 1 | 0 | -1.555810 | -0.173841 | -1.613530 |
| 41 | 1 | 0 | -3.183072 | 0.504930  | -1.626665 |
| 42 | 1 | 0 | -2.953965 | -1.228587 | -1.788723 |
| 43 | 6 | 0 | -1.751783 | -2.116158 | 2.165782  |
| 44 | 1 | 0 | -1.305077 | -1.303374 | 2.735364  |
| 45 | 1 | 0 | -1.118637 | -2.997349 | 2.272158  |
| 46 | 1 | 0 | -2.716786 | -2.347411 | 2.614064  |
| 47 | 8 | 0 | -2.379953 | 1.928964  | 0.178255  |
| 48 | 6 | 0 | -2.379533 | 3.113262  | 0.827689  |
| 49 | 6 | 0 | -2.753807 | 4.242326  | -0.094631 |
| 50 | 1 | 0 | -2.236041 | 4.148031  | -1.049604 |
| 51 | 1 | 0 | -2.512733 | 5.192407  | 0.377722  |
| 52 | 1 | 0 | -3.828375 | 4.205014  | -0.292412 |
| 53 | 8 | 0 | -2.126842 | 3.229785  | 2.005573  |
| 54 | 6 | 0 | -2.790602 | -2.872095 | 0.152134  |
| 55 | 6 | 0 | -4.236765 | -2.319844 | 0.337344  |
| 56 | 6 | 0 | -4.193049 | -0.798526 | 0.579755  |

|    |   |   |           |           |           |
|----|---|---|-----------|-----------|-----------|
| 57 | 8 | 0 | -2.572874 | -3.986912 | -0.248777 |
| 58 | 8 | 0 | -5.222480 | -3.004128 | 0.267899  |
| 59 | 8 | 0 | -5.072081 | -0.237597 | -0.405322 |
| 60 | 6 | 0 | -5.709009 | 0.970338  | 0.062155  |
| 61 | 1 | 0 | -5.272228 | 1.822585  | -0.465805 |
| 62 | 6 | 0 | -5.415371 | 1.033085  | 1.566165  |
| 63 | 1 | 0 | -4.644989 | 1.771070  | 1.796679  |
| 64 | 1 | 0 | -6.302989 | 1.300194  | 2.140072  |
| 65 | 6 | 0 | -4.938824 | -0.387966 | 1.902530  |
| 66 | 1 | 0 | -5.823090 | -1.034384 | 1.872345  |
| 67 | 6 | 0 | -4.360034 | -0.510089 | 3.312957  |
| 68 | 1 | 0 | -3.411848 | 0.009725  | 3.451367  |
| 69 | 1 | 0 | -4.234663 | -1.547357 | 3.623838  |
| 70 | 1 | 0 | -5.076744 | -0.060991 | 4.006018  |
| 71 | 6 | 0 | -7.211137 | 0.923063  | -0.239858 |
| 72 | 1 | 0 | -7.656622 | 0.084963  | 0.316819  |
| 73 | 6 | 0 | -7.633348 | 0.752980  | -1.727028 |
| 74 | 6 | 0 | -7.435175 | -0.672016 | -2.243781 |
| 75 | 1 | 0 | -6.378765 | -0.930952 | -2.297616 |
| 76 | 1 | 0 | -7.872871 | -0.763035 | -3.242494 |
| 77 | 1 | 0 | -7.934170 | -1.387345 | -1.585694 |
| 78 | 6 | 0 | -6.974705 | 1.787392  | -2.642857 |
| 79 | 1 | 0 | -5.906838 | 1.591043  | -2.760436 |
| 80 | 1 | 0 | -7.105905 | 2.793515  | -2.240635 |
| 81 | 1 | 0 | -7.428455 | 1.748279  | -3.637924 |

|     |   |   |           |           |           |
|-----|---|---|-----------|-----------|-----------|
| 82  | 8 | 0 | -9.061308 | 1.021993  | -1.650875 |
| 83  | 1 | 0 | -9.390573 | 1.168001  | -2.544510 |
| 84  | 8 | 0 | -7.722738 | 2.160789  | 0.254963  |
| 85  | 1 | 0 | -8.606281 | 2.234206  | -0.134118 |
| 86  | 6 | 0 | 7.402253  | 2.122279  | 0.600614  |
| 87  | 1 | 0 | 6.567223  | 2.277265  | -0.089294 |
| 88  | 1 | 0 | 7.453604  | 2.975814  | 1.275267  |
| 89  | 6 | 0 | 8.706561  | 1.978885  | -0.193652 |
| 90  | 1 | 0 | 9.557642  | 2.024434  | 0.490461  |
| 91  | 6 | 0 | 8.736292  | 0.638694  | -0.948999 |
| 92  | 1 | 0 | 9.737042  | 0.478578  | -1.355617 |
| 93  | 6 | 0 | 8.386764  | -0.524310 | -0.002633 |
| 94  | 1 | 0 | 8.307861  | -1.450171 | -0.574513 |
| 95  | 6 | 0 | 7.059723  | -0.252760 | 0.721182  |
| 96  | 1 | 0 | 6.888952  | -1.008829 | 1.492239  |
| 97  | 8 | 0 | 7.148424  | 0.974022  | 1.436474  |
| 98  | 8 | 0 | 9.416549  | -0.718985 | 0.962568  |
| 99  | 1 | 0 | 9.294667  | -0.057750 | 1.655748  |
| 100 | 8 | 0 | 7.852589  | 0.702299  | -2.075230 |
| 101 | 1 | 0 | 6.959042  | 0.501366  | -1.754653 |
| 102 | 8 | 0 | 8.849479  | 3.062128  | -1.102300 |
| 103 | 1 | 0 | 8.335685  | 2.807901  | -1.883025 |

---

**Conformer b-4**

---

| Center<br>Number | Atomic<br>Number | Atomic<br>Type | Coordinates (Angstroms) |   |   |
|------------------|------------------|----------------|-------------------------|---|---|
|                  |                  |                | X                       | Y | Z |

---



---

|    |   |   |           |           |           |
|----|---|---|-----------|-----------|-----------|
| 1  | 8 | 0 | 6.020066  | -0.234360 | -0.229031 |
| 2  | 6 | 0 | 3.934433  | 0.867631  | 0.412904  |
| 3  | 1 | 0 | 4.482943  | 1.487999  | 1.125056  |
| 4  | 1 | 0 | 3.924708  | 1.401574  | -0.542136 |
| 5  | 6 | 0 | 4.666253  | -0.460256 | 0.247375  |
| 6  | 1 | 0 | 4.746401  | -0.945838 | 1.228645  |
| 7  | 6 | 0 | 3.951996  | -1.452256 | -0.711155 |
| 8  | 6 | 0 | 2.491158  | -1.646461 | -0.163608 |
| 9  | 1 | 0 | 2.607768  | -2.057551 | 0.850638  |
| 10 | 6 | 0 | 1.738202  | -0.321836 | 0.018013  |
| 11 | 6 | 0 | 2.501513  | 0.648066  | 0.910518  |
| 12 | 1 | 0 | 1.997845  | 1.613509  | 0.973194  |
| 13 | 1 | 0 | 2.534992  | 0.243271  | 1.930553  |
| 14 | 6 | 0 | 1.680598  | -2.690447 | -0.956739 |
| 15 | 1 | 0 | 1.707238  | -2.464269 | -2.029316 |
| 16 | 1 | 0 | 2.149450  | -3.671289 | -0.853817 |
| 17 | 6 | 0 | 0.251755  | -2.788788 | -0.496961 |
| 18 | 1 | 0 | -0.237562 | -3.749687 | -0.591984 |
| 19 | 6 | 0 | -0.421752 | -1.751793 | 0.010272  |
| 20 | 6 | 0 | 0.208926  | -0.390341 | 0.141241  |
| 21 | 6 | 0 | -1.837271 | -1.868803 | 0.568038  |
| 22 | 6 | 0 | -2.670707 | -0.557462 | 0.242911  |
| 23 | 6 | 0 | -2.039344 | 0.637046  | 0.984825  |
| 24 | 1 | 0 | -2.453363 | 0.737070  | 1.983179  |
| 25 | 6 | 0 | -0.496035 | 0.548187  | 1.117915  |

|    |   |   |           |           |           |
|----|---|---|-----------|-----------|-----------|
| 26 | 1 | 0 | -0.104508 | 1.558824  | 1.023076  |
| 27 | 1 | 0 | -0.267216 | 0.241544  | 2.142668  |
| 28 | 6 | 0 | 3.976752  | -0.920170 | -2.157598 |
| 29 | 1 | 0 | 3.510714  | -1.632115 | -2.841873 |
| 30 | 1 | 0 | 5.008475  | -0.785373 | -2.489318 |
| 31 | 1 | 0 | 3.456481  | 0.032525  | -2.263425 |
| 32 | 6 | 0 | 4.708569  | -2.795043 | -0.663356 |
| 33 | 1 | 0 | 4.304081  | -3.508762 | -1.383467 |
| 34 | 1 | 0 | 4.650770  | -3.247482 | 0.332127  |
| 35 | 1 | 0 | 5.761745  | -2.644453 | -0.907621 |
| 36 | 6 | 0 | 0.876255  | 0.219337  | -1.091047 |
| 37 | 1 | 0 | 0.808572  | -0.329415 | -2.022537 |
| 38 | 1 | 0 | 0.811819  | 1.296766  | -1.204224 |
| 39 | 6 | 0 | -2.588379 | -0.345515 | -1.293243 |
| 40 | 1 | 0 | -1.566432 | -0.164928 | -1.613444 |
| 41 | 1 | 0 | -3.201059 | 0.496859  | -1.595815 |
| 42 | 1 | 0 | -2.954689 | -1.225499 | -1.831158 |
| 43 | 6 | 0 | -1.733784 | -2.264543 | 2.079624  |
| 44 | 1 | 0 | -1.287084 | -1.474858 | 2.680859  |
| 45 | 1 | 0 | -1.098488 | -3.148043 | 2.148425  |
| 46 | 1 | 0 | -2.697183 | -2.514906 | 2.520725  |
| 47 | 8 | 0 | -2.411264 | 1.851587  | 0.263529  |
| 48 | 6 | 0 | -2.433686 | 3.007469  | 0.961353  |
| 49 | 6 | 0 | -2.806722 | 4.168673  | 0.079193  |
| 50 | 1 | 0 | -2.171056 | 4.188795  | -0.807601 |

|    |   |   |           |           |           |
|----|---|---|-----------|-----------|-----------|
| 51 | 1 | 0 | -2.704489 | 5.096981  | 0.637026  |
| 52 | 1 | 0 | -3.840179 | 4.058026  | -0.257870 |
| 53 | 8 | 0 | -2.192707 | 3.078953  | 2.145313  |
| 54 | 6 | 0 | -2.766482 | -2.948420 | 0.037522  |
| 55 | 6 | 0 | -4.219148 | -2.422120 | 0.246313  |
| 56 | 6 | 0 | -4.194156 | -0.912496 | 0.552688  |
| 57 | 8 | 0 | -2.535127 | -4.043060 | -0.409126 |
| 58 | 8 | 0 | -5.196710 | -3.114588 | 0.147467  |
| 59 | 8 | 0 | -5.080144 | -0.325794 | -0.407655 |
| 60 | 6 | 0 | -5.712385 | 0.873891  | 0.101701  |
| 61 | 1 | 0 | -5.254159 | 1.740905  | -0.382913 |
| 62 | 6 | 0 | -5.441299 | 0.861812  | 1.611212  |
| 63 | 1 | 0 | -4.688598 | 1.602163  | 1.889997  |
| 64 | 1 | 0 | -6.341606 | 1.086430  | 2.181918  |
| 65 | 6 | 0 | -4.943999 | -0.565049 | 1.890101  |
| 66 | 1 | 0 | -5.819539 | -1.221749 | 1.834874  |
| 67 | 6 | 0 | -4.363718 | -0.737125 | 3.294758  |
| 68 | 1 | 0 | -3.422854 | -0.210369 | 3.456336  |
| 69 | 1 | 0 | -4.223556 | -1.784777 | 3.562244  |
| 70 | 1 | 0 | -5.086914 | -0.327602 | 4.005484  |
| 71 | 6 | 0 | -7.214866 | 0.836975  | -0.253721 |
| 72 | 1 | 0 | -7.612492 | -0.134973 | 0.051635  |
| 73 | 6 | 0 | -7.548857 | 1.070141  | -1.753270 |
| 74 | 6 | 0 | -9.056687 | 0.896288  | -1.977115 |
| 75 | 1 | 0 | -9.349066 | -0.147650 | -1.835914 |

|     |   |   |           |           |           |
|-----|---|---|-----------|-----------|-----------|
| 76  | 1 | 0 | -9.320555 | 1.181363  | -3.000051 |
| 77  | 1 | 0 | -9.624769 | 1.513842  | -1.281357 |
| 78  | 6 | 0 | -6.764715 | 0.190974  | -2.728682 |
| 79  | 1 | 0 | -6.940478 | -0.869324 | -2.532609 |
| 80  | 1 | 0 | -5.694765 | 0.377740  | -2.657941 |
| 81  | 1 | 0 | -7.092502 | 0.407650  | -3.749999 |
| 82  | 8 | 0 | -7.185590 | 2.461245  | -1.952083 |
| 83  | 1 | 0 | -7.574721 | 2.763568  | -2.779986 |
| 84  | 8 | 0 | -7.900484 | 1.828496  | 0.514239  |
| 85  | 1 | 0 | -7.792567 | 2.651334  | 0.014624  |
| 86  | 6 | 0 | 7.359917  | 2.160170  | 0.648362  |
| 87  | 1 | 0 | 6.527611  | 2.314069  | -0.045099 |
| 88  | 1 | 0 | 7.395831  | 3.004900  | 1.334996  |
| 89  | 6 | 0 | 8.671670  | 2.044073  | -0.138156 |
| 90  | 1 | 0 | 9.517131  | 2.091726  | 0.552757  |
| 91  | 6 | 0 | 8.724293  | 0.714503  | -0.910883 |
| 92  | 1 | 0 | 9.730065  | 0.572567  | -1.311831 |
| 93  | 6 | 0 | 8.382225  | -0.465454 | 0.016859  |
| 94  | 1 | 0 | 8.319738  | -1.384616 | -0.567718 |
| 95  | 6 | 0 | 7.046163  | -0.220533 | 0.733617  |
| 96  | 1 | 0 | 6.878793  | -0.989383 | 1.492722  |
| 97  | 8 | 0 | 7.115002  | 0.997289  | 1.466604  |
| 98  | 8 | 0 | 9.406671  | -0.659786 | 0.987851  |
| 99  | 1 | 0 | 9.269629  | -0.010398 | 1.689364  |
| 100 | 8 | 0 | 7.848501  | 0.782443  | -2.042998 |

|     |   |   |          |          |           |
|-----|---|---|----------|----------|-----------|
| 101 | 1 | 0 | 6.955159 | 0.566504 | -1.731862 |
| 102 | 8 | 0 | 8.806979 | 3.140755 | -1.031762 |
| 103 | 1 | 0 | 8.302846 | 2.889395 | -1.819717 |

---

## Experimental and calculated UV and ECD spectra

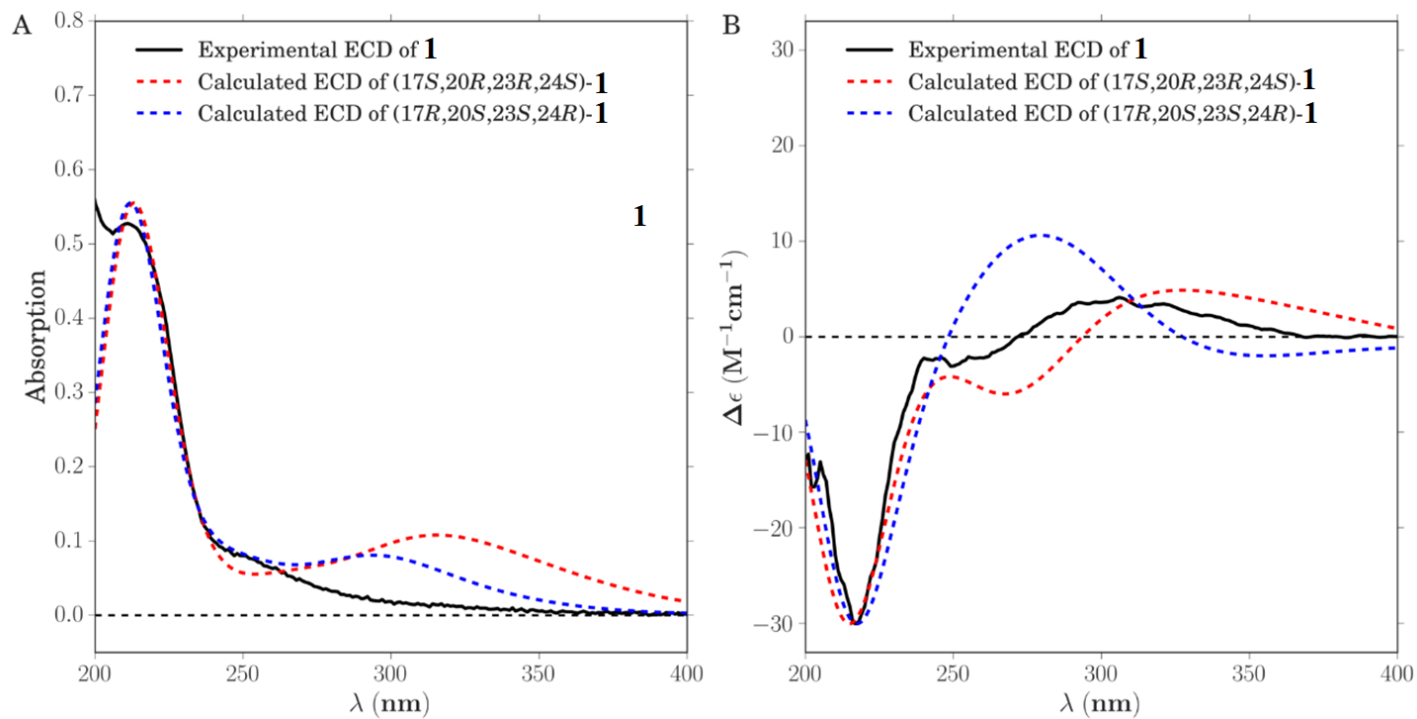

**Figure S24.** Calculated UV (A) and ECD (B) spectra of configurations **a** (red line) and **b** (blue dash) were compared with the experimental.
